# Supplementary material for: Exercise as a prescription for patients with various diseases
Source: PubMed Central journal article supplement — J Sport Health Sci. 2019 Apr 18;8(5):422–41. doi: 10.1016/j.jshs.2019.04.002 (PMC6742679; doi:10.1016/j.jshs.2019.04.002), 2019-04-18
Supplement: mmc2.pdf [file mmc2.pdf]

Supplementary Table 1.

## Exercise prescriptions for low back pain.

| Types of exercise                                                | Sample size, subjects characteristics                             | Intervention                   | Duration                          | Frequency                                                                  | Intensity | References |
|------------------------------------------------------------------|-------------------------------------------------------------------|--------------------------------|-----------------------------------|----------------------------------------------------------------------------|-----------|------------|
| AE                                                               | 160 subjects,<br>G1 = 44.3 ± 13.0 years<br>G2 = 43.4 ± 13.5 years | G1: usual health care          | 10 weeks                          | —                                                                          | —         | 26         |
|                                                                  |                                                                   | G2: Tai Chi                    |                                   | 40 min, 2 times per week for 8 weeks followed by once per week for 2 weeks |           |            |
|                                                                  | 80 subjects,<br>G1 = 48.0 ± 4.0 years<br>G2 = 49.0 ± 3.6 years    | G1: physical therapy exercises | 7 days                            | once 1 h, twice/day                                                        | —         | 27         |
|                                                                  |                                                                   | G2: yoga programs              |                                   | once 1 h, twice/day                                                        |           |            |
|                                                                  | 46 subjects,<br>G1 = 22.8 ± 3.6 years<br>G2 = 21.8 ± 3.2 years    | G1: in the sitting position    | once                              | 20 min                                                                     | —         | 28         |
|                                                                  |                                                                   | G2: Pilates                    |                                   | 20 min                                                                     |           |            |
|                                                                  | 54 subjects,<br>G1 = 38.0 ± 12.0 years<br>G2 = 40.0 ± 16.0 years  | G1: usual activities           | 8 weeks                           | —                                                                          | —         | 29         |
|                                                                  |                                                                   | G2: Pilates                    |                                   | 45 min, twice/week                                                         |           |            |
| 87 subjects,<br>G1 = 48.9 ± 16.4 years<br>G2 = 49.3 ± 14.1 years | G1: general exercise                                              | 6 weeks                        | 4 daily                           | —                                                                          | 30        |            |
|                                                                  | G2: clinical Pilates                                              |                                | 60 min, twice/week                |                                                                            |           |            |
| 60 subjects,<br>G1 = 55.5 ± 7.1 years<br>G2 = 46.9 ± 10.3 years  | G1: inactivity control                                            | 6 months                       | —                                 | —                                                                          | 31        |            |
|                                                                  | G2: Pilates                                                       |                                | 1 hour lesson, 5 lessons per week |                                                                            |           |            |
| 38 subjects,<br>G1 = 41.63 ± 13.01 years                         | G1: usual activities                                              | 14 weeks                       | —                                 | —                                                                          | 32        |            |
|                                                                  | G2: Pilates                                                       |                                | 50 min, 3 times per week          |                                                                            |           |            |

|              |                                                                    |                                                                                       |          |                                                           |                                |    |
|--------------|--------------------------------------------------------------------|---------------------------------------------------------------------------------------|----------|-----------------------------------------------------------|--------------------------------|----|
|              | G2 = 41.31 ± 11.24 years                                           |                                                                                       |          |                                                           |                                |    |
|              | 101 subjects,<br>G1 = 55.5 ± 7.10 years<br>G2 = 46.9 ± 10.3 years  | G1: passive modalities<br>G2: AE                                                      | 12 weeks | —<br>30–45 min; 3 days/week                               | —<br>70%–85% HR <sub>max</sub> | 33 |
|              | 469 children,<br>8–11 years                                        | G1: education alone<br>G2: 4 simple spine<br>movements as part of a health<br>program | 9 months | —<br>3 times/day                                          | —                              | 34 |
| WBV exercise | 120 subjects,<br>18–60 years                                       | G1: the same exercise protocol<br>as the WBV group, but<br>without vibration          | 3 months | twice a week                                              | —                              | 35 |
|              |                                                                    | G2: WBV exercise with 5<br>exercise positions                                         |          | twice a week                                              |                                |    |
|              | 41 subjects,<br>G1 = 44.6 ± 9.1 years<br>G2 = 46.4 ± 9.3 years     | G1: usual activities<br>G2: WBV training                                              | 3 months | —<br>2.5 times per week                                   | —                              | 36 |
|              | 49 subjects,<br>G1 = 59.53 ± 5.47 years<br>G2 = 58.71 ± 4.59 years | G1: non-intervention<br>G2: WBV exercise                                              | 12 weeks | —<br>2 times/week, with 1 day of<br>rest between sessions | —                              | 37 |

Abbreviations: AE = aerobic exercise; G = Group; HR<sub>max</sub> = maximum heart rate; WBV = whole body vibration.

Supplementary Table 2.

## Exercise prescriptions for tendon injury.

| Types of exercise                 | Sample size, subjects characteristics                                                                                   | Intervention                                                                                          | Duration | Frequency                           | Intensity                                         | References |
|-----------------------------------|-------------------------------------------------------------------------------------------------------------------------|-------------------------------------------------------------------------------------------------------|----------|-------------------------------------|---------------------------------------------------|------------|
| RE                                | 81 patients with tennis elbow,<br>G1 = 48.6 ± 12.3 years<br>G2 = 50.2 ± 10.8 years                                      | G1: wait and see                                                                                      | 3 months | —                                   | —                                                 | 45         |
|                                   |                                                                                                                         | G2: daily exercise with progressively increasing load on the extensor muscles of the affected forearm |          | once daily                          | 3 sets of 15 repetitions, 45 repetitions in total |            |
|                                   | 86 patients with a clinical diagnosis of rotator cuff tendinopathy,<br>G1 = 48.6 ± 12.3 years<br>G2 = 50.2 ± 10.8 years | G1: usual physiotherapy                                                                               | 3 months | —                                   | —                                                 | 51         |
| G2: self-managed loaded exercise  |                                                                                                                         | twice per day                                                                                         |          | 3 sets of 10–15 repetitions         |                                                   |            |
| AE                                | 24 participants with rotator cuff tendinopathy,<br>G1 = 44–79 years<br>G2 = 46–76 years                                 | G1: usual physiotherapy treatment                                                                     | 3 months | —                                   | —                                                 | 52         |
|                                   |                                                                                                                         | G2: self-managed loaded exercise                                                                      |          | twice per day                       | 3 sets of 10–15 repetitions                       |            |
|                                   | 120 patients with shoulder pain,<br>G1 = 49.5 years<br>G2 = 50.4 years<br>G3 = 49.8 years                               | G1: minimally loaded range of movement exercises                                                      | 6 weeks  | twice per day                       | —                                                 | 53         |
| G2: open chain resisted exercises |                                                                                                                         | twice per day                                                                                         |          | complete 10 repetitions before rest |                                                   |            |
| G3: closed chain exercises        |                                                                                                                         | twice per day                                                                                         |          | 3 sets of 10 repetitions            |                                                   |            |

|                                  |                                                                                                                               |                                       |           |                                                              |                                                                       |    |
|----------------------------------|-------------------------------------------------------------------------------------------------------------------------------|---------------------------------------|-----------|--------------------------------------------------------------|-----------------------------------------------------------------------|----|
| eccentric exercise               | 120 patients with tennis elbow,<br>G1 = 47.0 ± 9.4 years<br>G2 = 48.8 ± 6.7 years                                             | G1: concentric exercise               | 12 months | once daily                                                   | 3 sets of 15 repetitions, in total 45 weight lifting manoeuvres       | 41 |
|                                  |                                                                                                                               | G2: eccentric exercise                |           | once daily                                                   | 3 sets of 15 repetitions, in total 45 weight lowering manoeuvres      |    |
|                                  | 36 patients with rotator cuff tendinopathy,<br>G1 = 48.6 ± 12.3 years<br>G2 = 50.2 ± 10.8 years                               | G1: conventional exercise             | 12 weeks  | daily                                                        | 3 sets of 8 repetitions                                               | 44 |
|                                  |                                                                                                                               | G2: isolated eccentric exercise       |           | daily                                                        | a speed of 6–8 s per repetition                                       |    |
|                                  | 107 subjects with affected elbows,<br>G1 = 47.0 ± 9.4 years<br>G2 = 48.8 ± 6.7 years                                          | G1: Astym treatment                   | 4 weeks   | 2 times weekly                                               | —                                                                     | 48 |
|                                  |                                                                                                                               | G2: eccentric exercise and stretching |           | 2 times per week for 2 pain free sets of 15 repetitions each | 2 pain free sets of 15 repetitions, increasing to 3 sets as tolerated |    |
|                                  | 9 male adults without AT and 11 male adults with unilateral mid-portion AT,<br>G1 = 48.2 ± 3.8 years<br>G2 = 49.0 ± 4.5 years | G1: control                           | once      | —                                                            | —                                                                     | 50 |
|                                  |                                                                                                                               | G2: eccentric exercise                |           | 15 times per exercise set                                    | —                                                                     |    |
| vibration training and eccentric | 58 patients with AT,<br>G1 = 44.4 ± 7.7 years                                                                                 | G1: wait and see                      | 12 weeks  | —                                                            | —                                                                     | 47 |

|                                   |                                                                                  |                                                       |          |                                                             |                                      |    |
|-----------------------------------|----------------------------------------------------------------------------------|-------------------------------------------------------|----------|-------------------------------------------------------------|--------------------------------------|----|
| training                          | G2 = 46.0 ± 6.9 years<br>G3 = 45.7 ± 8.5 years                                   | G2: vibration training                                |          | 1–4 weeks: 4–5 min; 5–8 weeks: 5–6 min; 9–12 weeks: 6–7 min | —                                    |    |
|                                   |                                                                                  | G3: eccentric training using a Reebok Step            |          | —                                                           | 3 sets of 15 repetitions on each leg |    |
| concentric and eccentric exercise | 86 patients with tennis elbow,<br>G1 = 47.0 ± 9.4 years<br>G2 = 48.8 ± 6.7 years | G1: Alfredson isolated eccentric training program     | 12 weeks | twice daily                                                 | 3 sets of 15 repetitions             | 49 |
|                                   |                                                                                  | G2: Silbernagel combined concentric-eccentric program |          | once daily                                                  | 3 sets of 15 repetitions             |    |

Abbreviations: AE = aerobic exercise; AT = Achilles tendinopathy; G = Group; RE = resistance exercise.

Supplementary Table 3.

## Exercise prescriptions for osteoporosis.

| Types of exercise           | Sample size, subjects characteristics                          | Intervention                                | Duration | Frequency                                                                                     | Intensity                                                       | References |
|-----------------------------|----------------------------------------------------------------|---------------------------------------------|----------|-----------------------------------------------------------------------------------------------|-----------------------------------------------------------------|------------|
| AE and RE                   | 36 subjects,<br>45–65 years                                    | G1: usual care                              | 6 weeks  | —                                                                                             | —                                                               | 61         |
|                             |                                                                | G2: aerobic walking exercise on a treadmill |          | 30 min daily, 3 times a week                                                                  | 0–2 weeks: 50%HRR,<br>2–4 weeks: 55% HRR,<br>4–6 weeks: 60% HRR |            |
|                             |                                                                | G3: weighted-vest                           |          | 30 min daily, 3 times a week                                                                  | 4% of the body weight and was increased 2%/ 2 weeks             |            |
| AE                          | 86 subjects,<br>G1 = 60.4 ± 5.3 years<br>G2 = 58.8 ± 5.6 years | G1: usual care                              | 9 months | —                                                                                             | —                                                               | 62         |
|                             |                                                                | G2: Tai Chi plus usual care                 |          | 30 min per session, 2 classes per week for the first month, and 1 class per week for 8 months | —                                                               |            |
| ME                          | 65 subjects,<br>G1 = 57.4 ± 4.8 years<br>G2 = 58.8 ± 4.5 years | G1: usual habits                            | 24 weeks | —                                                                                             | —                                                               | 16         |
|                             |                                                                | G2: strength and balance exercises          |          | 60 min, 3 sessions per week                                                                   | low intensity                                                   |            |
|                             | 53 subjects,<br>G1 = 56.3 ± 6.4 years<br>G2 = 53.1 ± 7.6 years | G1: AE program on treadmill                 | 4 weeks  | 30 min, twice a week                                                                          | 60%–85% HR <sub>max</sub>                                       | 63         |
|                             |                                                                | G2: control                                 | —        | —                                                                                             | —                                                               |            |
| 150 subjects,<br>≥ 65 years | G1: usual care                                                 | 12 weeks                                    | —        | —                                                                                             | 64                                                              |            |

|    |                                                                 |                                                                                          |          |                                                                              |                                                                                                                                                                     |    |
|----|-----------------------------------------------------------------|------------------------------------------------------------------------------------------|----------|------------------------------------------------------------------------------|---------------------------------------------------------------------------------------------------------------------------------------------------------------------|----|
|    |                                                                 | G2: multicomponent exercise program                                                      |          | 1 h, twice a week                                                            | RPE scale: 13–14                                                                                                                                                    |    |
| CT | 85 subjects,<br>G1 = 54.9 ± 3.5 years<br>G2 = 55.8 ± 3.2 years  | G1: unvarying lifestyle                                                                  | 12 years | —                                                                            | —                                                                                                                                                                   | 65 |
|    |                                                                 | G2: supervised exercise                                                                  |          | 2 supervised classes (60 min) and 2 home training sessions (20 min) per week | AE: 70%–85% HR <sub>max</sub> ;<br>RE: 1–4sets, 70%–90% 1-RM, 4–12 repetitions                                                                                      |    |
|    | 137 subjects,<br>G1 = 55.5 ± 3.2 years<br>G2 = 53.5 ± 3.4 years | G1: sedentary control                                                                    | 16 years | —                                                                            | —                                                                                                                                                                   | 66 |
|    |                                                                 | G2 : low and high-impact aerobic dance exercises with high-intensity resistance training |          | 60–65 min and 2 home training sessions of 20–25 min for 49–50 weeks per year | AE: 70%–75% HR <sub>max</sub> ;<br>RE: on machines (1–4weeks: 70%–90% 1-RM, 4–6 weeks: 50–55% 1-RM) but higher volume (2–3 sets, 20–25 repetitions) or free weights |    |

Abbreviations: 1-RM = one-repetition maximum; AE = aerobic exercise; CT = combined aerobic exercise with resistance training; G = Group; HRR = heart rate reserve; HR<sub>max</sub> = maximum heart rate; ME = multimodal exercise; RE = resistance exercise; RPE = rating of perceived exertion.

Supplementary Table 4.  
Exercise prescriptions for osteoarthritis.

| Types of exercise                                                                       | Sample size, subjects characteristics                                                   | Intervention                                                     | Duration                                              | Frequency                                                                             | Intensity                                      | References |
|-----------------------------------------------------------------------------------------|-----------------------------------------------------------------------------------------|------------------------------------------------------------------|-------------------------------------------------------|---------------------------------------------------------------------------------------|------------------------------------------------|------------|
| aquatic exercise                                                                        | 85 subjects,<br>G1 = 63.3 ± 5.3 years<br>G2 = 65.7 ± 8.9 years<br>G3 = 67.7 ± 7.8 years | G1: control                                                      | 8 weeks                                               | —                                                                                     | —                                              | 71         |
|                                                                                         |                                                                                         | G2: aquatic exercises                                            |                                                       | 30 min, 3 times a week                                                                | 65% HR <sub>max</sub>                          |            |
|                                                                                         |                                                                                         | G3: land-based exercise                                          |                                                       | 40 min, 3 times a week                                                                | 40%–60% 1-RM                                   |            |
|                                                                                         | 87 subjects,<br>G1 = 63.9 ± 2.4 years<br>G2 = 63.8 ± 2.4 years                          | G1: normal physical activity                                     | 16 weeks                                              | —                                                                                     | —                                              | 72         |
|                                                                                         |                                                                                         | G2: 48 supervised intensive aquatic resistance training sessions |                                                       | 1 h, 3 times a week                                                                   | RPE scale: 12–16;<br>80%–95% HR <sub>max</sub> |            |
|                                                                                         | 249 subjects,<br>G1 = 66.0 ± 6.1 years<br>G2 = 65.7 ± 5.9 years                         | G1: usual activity levels                                        | 20 weeks                                              | —                                                                                     | —                                              | 73         |
| G2: aquatic exercise                                                                    |                                                                                         | 2–5 times per week                                               |                                                       | —                                                                                     |                                                |            |
| 50 subjects,<br>40–65 years                                                             | G1: educational attention                                                               | 3 months                                                         | 1.5 h, on a weekly basis                              | —                                                                                     | 74                                             |            |
|                                                                                         | G2: aerobic aquatic exercise (water temperature of 31 °C)                               |                                                                  | 60 min, twice a week                                  | 57%–67% HR <sub>max</sub> , RPE scale: 4–6; 64–74% HR <sub>max</sub> , RPE scale: 5–6 |                                                |            |
| 79 subjects,<br>G1 = 75.8 ± 6.2 years<br>G2 = 74.4 ± 7.5 years<br>G3 = 73.2 ± 4.8 years | G1: usual activities                                                                    | 11 weeks                                                         | a phone call from the study coordinator every 2 weeks | —                                                                                     | 75                                             |            |
|                                                                                         | G2: aquatics exercise                                                                   |                                                                  | 45 min, twice/week                                    | —                                                                                     |                                                |            |



|    |                                                                                         |                                                                                                              |          |                                                                                                                                                                                                                                     |                      |    |
|----|-----------------------------------------------------------------------------------------|--------------------------------------------------------------------------------------------------------------|----------|-------------------------------------------------------------------------------------------------------------------------------------------------------------------------------------------------------------------------------------|----------------------|----|
|    |                                                                                         | G3: aquatics exercise and education                                                                          |          | aquatic exercise: 45 min, 2 times/week and a 30 min educational session preceding the aquatic class once a week                                                                                                                     | —                    |    |
|    | 34 subjects,<br>G1 = 66.0 ± 6.35 years<br>G2 = 65.62 ± 7.15 years                       | G1: a traditional aquatic exercise program<br>G2: dance-based aquatic exercise (water temperature was 32 °C) | 8 weeks  | 45 min, 3 times/week<br>21 min, 3 times/week                                                                                                                                                                                        | RPE scale: 4–6       | 76 |
| AE | 83 subjects,<br>G1 = 71.8 ± 8.0 years<br>G2 = 68.9 ± 7.7 years<br>G3 = 74.4 ± 7.5 years | G1: OA education brochures and weekly phone calls<br>G2: Hatha yoga<br>G3: aerobic/strengthening exercise    | 8 weeks  | weekly<br>45 min class/week and additional 30 min/day, 4 times/week of yoga practice at home<br>aerobic exercise: 15–30 min/day, 4 times/week, the strengthening exercise: 30 min/day, 2 times/week on non-consecutive days at home | —<br>—<br>low-impact | 77 |
|    | 31 subjects,<br>G1 = 71.1 ± 9.3 years                                                   | G1: meditation with no exercise                                                                              | 12 weeks | —                                                                                                                                                                                                                                   | —                    | 78 |

|    |                                                                   |                                                                                            |          |                                                 |                                                                                                 |        |
|----|-------------------------------------------------------------------|--------------------------------------------------------------------------------------------|----------|-------------------------------------------------|-------------------------------------------------------------------------------------------------|--------|
|    | G2 = 63.7 ± 8.9 years<br>G3 = 65.5 ± 5.6 years                    | G2: traditional leg strengthening on machine                                               |          | 3 of 4 available 1 h classes/sessions each week | 7 out of 10 on the Borg Perceived Exertion Scale                                                |        |
|    |                                                                   | G3: biomechanically-based yoga exercises                                                   |          | 3 of 4 available 1 h classes/sessions each week | 7 out of 10 on the Borg Perceived Exertion Scale                                                |        |
|    | 46 subjects,<br>G1 = 64.53 ± 3.43 years<br>G2 = 64.61 ± 3.4 years | G1: educational classes                                                                    | 24 weeks | bi-weekly educational classes                   | —                                                                                               | 79     |
|    |                                                                   | G2: Tai Ji Quan training                                                                   |          | 60 min session, three times/week                | —                                                                                               |        |
|    | 48 subjects,<br>G1 = 59.0 ± 2.0 years<br>G2 = 61.0 ± 1.0 years    | G1: swimming (water temperature: 27 °C–28 °C)                                              | 12 weeks | 20–30 min/day, then 40–45 min/day, 3 days/week  | 40%–50% HRR, then 60%–70% HRR                                                                   | 69, 80 |
|    |                                                                   | G2: cycling (a stationary cycle ergometer)                                                 |          | 20–30 min/day, then 40–45 min/day, 3 days/week  | 40%–50% HRR, then 60%–70% HRR                                                                   |        |
| RE | 41 subjects,<br>G1 = 70.8 ± 8.4 years<br>G2 = 65.0 ± 8.4 years    | G1: conventional modality treatments                                                       | 8 weeks  | —                                               | —                                                                                               | 81     |
|    |                                                                   | G2: supervised exercise with elastic bands in addition to conventional modality treatments |          | 2–3 times/week                                  | 2 sets of 12 repetitions of elastic-band leg-press exercises in the last session with RPE of 13 |        |
|    | 40 subjects,<br>G1 = 63.20 ± 3.69                                 | G1: lecture and discussion                                                                 | 8 weeks  | 1 h session/week                                | —                                                                                               | 82     |

|            |                                                                 |                                                                  |          |                                                                  |                                                                                        |    |
|------------|-----------------------------------------------------------------|------------------------------------------------------------------|----------|------------------------------------------------------------------|----------------------------------------------------------------------------------------|----|
|            | years<br>G2 = 64.07 ± 4.45<br>years                             | G2: strength exercise                                            |          | 1 h, 3 times/week                                                | —                                                                                      |    |
|            | 46 subjects,<br>G1 = 51.9 ± 7.0 years<br>G2 = 53.1 ± 10.2 years | G1: high-velocity resistance training                            | 8 weeks  | daily                                                            | 2 sets of 10 repetitions for the first 2 weeks and 3 sets of 10 repetitions thereafter | 83 |
|            |                                                                 | G2: low-velocity resistance training                             |          | daily                                                            | 2 sets of 10 repetitions for the first 2 weeks and 3 sets of 10 repetitions thereafter |    |
| WBV and RE | 180 subjects,<br>50–70 years                                    | G1: health education                                             | 12 weeks | 1 h session/week                                                 | —                                                                                      | 84 |
|            |                                                                 | G2: lower extremity resistance training                          |          | 30 min,<br>3 sessions/week                                       | 3 sets of 10 repetitions                                                               |    |
|            |                                                                 | G3: WBV exercise                                                 |          | 3 days/week with at least 1 day between each session             | progressively increasing intensity                                                     |    |
|            | 49 subjects,<br>G1 = 61.5 ± 9.1 years<br>G2 = 61.2 ± 9.6 years  | G1: quadriceps resistance exercises                              | 24 weeks | 40min/day,<br>5 days/week                                        | 3 sets of 10 repetitions                                                               | 85 |
|            |                                                                 | G2: WBV exercise associated with quadriceps resistance exercises |          | 30 min/day, vibration 60 seconds, interval rest 60s, 5 days/week | 3 sets of 10 repetitions                                                               |    |
|            | 52 subjects,<br>G1 = 61.1 ± 8.5 years<br>G2 = 61.5 ± 9.2 years  | G1: no training                                                  | 8 weeks  | —                                                                | —                                                                                      | 86 |
|            |                                                                 | G2: WBV exercise on a stable platform                            |          | twice a week with at least 2 days of rest                        | progressively increasing intensity                                                     |    |

|    |                                                                  |                                                         |          |                                                              |                                                                                       |    |
|----|------------------------------------------------------------------|---------------------------------------------------------|----------|--------------------------------------------------------------|---------------------------------------------------------------------------------------|----|
|    | G3 = 58.7 ± 11.0 years                                           |                                                         |          | between 2 sessions                                           |                                                                                       |    |
|    |                                                                  | G3: WBV exercise on a balance board                     |          | twice a week with at least 2 days of rest between 2 sessions | progressively increasing intensity                                                    |    |
| ME | 53 subjects, 60–90 years                                         | G1: usual activities                                    | 8 weeks  | —                                                            | —                                                                                     | 87 |
|    |                                                                  | G2: high-speed resistance training                      |          | twice a week                                                 | 1–2weeks: 20%–40%<br>1-RM;<br>3–5weeks: 60%–80%<br>1-RM;<br>6–8weeks: 60%–80%<br>1-RM |    |
|    |                                                                  | G3: high-speed resistance training and balance training |          | twice a week                                                 | 1–2weeks: 20%–40%<br>1-RM;<br>3–5weeks: 60%–80%<br>1-RM;<br>6–8weeks: 60%–80%<br>1-RM |    |
|    | 109 subjects,<br>G1 = 57.2 ± 9.8 years<br>G2 = 58.4 ± 10.0 years | G1: education                                           | 12 weeks | once weekly                                                  | —                                                                                     | 88 |
|    |                                                                  | G2: exercise therapy and education                      |          | 2 or 3 weekly sessions                                       | —                                                                                     |    |

Abbreviations: 1-RM = one-repetition maximum; AE = aerobic exercise; G = Group; HRR = heart rate reserve; HR<sub>max</sub> = maximum heart rate; ME = multimodal exercise; RE = resistance exercise; RPE = rating of perceived exertion; WBV = whole body vibration.

Supplementary Table 5.

## Exercise prescriptions for hip fractures.

| Types of exercise | Sample size, subjects characteristics                            | Intervention                                                         | Duration | Frequency                                                            | Intensity | References |
|-------------------|------------------------------------------------------------------|----------------------------------------------------------------------|----------|----------------------------------------------------------------------|-----------|------------|
| AE                | 98 subjects,<br>G1 = 61.9 ± 9.6 years<br>G2 = 61.5 ± 8.2 years   | G1: usual care                                                       | 20 weeks | —                                                                    | —         | 93         |
|                   |                                                                  | G2: program consisted of 11 groups of balance exercise or activities |          | 1 h, twice weekly                                                    |           |            |
| HE                | 26 subjects,<br>G1 = 82.0 ± 6.0 years<br>G2 = 79.6 ± 5.9 years   | G1: conventional transcutaneous electrical nerve stimulation         | 10 weeks | —                                                                    | —         | 92         |
|                   |                                                                  | G2: leg-strengthening exercises                                      |          | 30–40 min, twice a week                                              |           |            |
|                   | 232 subjects,<br>G1 = 78.9 ± 9.4 years<br>G2 = 77.2 ± 10.2 years | G1: in-home and telephone-based cardiovascular nutrition education   | 6 months | 1 h                                                                  | —         | 94         |
|                   |                                                                  | G2: functionally oriented exercises                                  |          | 1 h, 3 times per week                                                |           |            |
| ME                | 82 subjects,<br>≥ 60 years                                       | G1: usual care                                                       | 3 months | —                                                                    | —         | 7          |
|                   |                                                                  | G2: physical exercise program                                        |          | 1 h, once a week by physiotherapists, at home, twice a week, using a |           |            |

|  |                                                                 |                                                                                                        |              |                                               |                                                                                                                            |    |
|--|-----------------------------------------------------------------|--------------------------------------------------------------------------------------------------------|--------------|-----------------------------------------------|----------------------------------------------------------------------------------------------------------------------------|----|
|  |                                                                 |                                                                                                        |              | booklet                                       |                                                                                                                            |    |
|  | 162 subjects,<br>G1 = 67.2 ± 5.5 years<br>G2 = 67.7 ± 6.5 years | G1: usual care<br>G2: Traditional PRT,<br>weight-bearing impact<br>training and/or balance<br>training | 12<br>months | —<br>60–180<br>min/session, 3<br>times weekly | —<br>2 sets of 12–15 repetitions at<br>40%–60% 1-RM (3–4 RPE<br>scale); PRT: 2 sets of 8–12<br>repetitions (5–8 RPE scale) | 95 |

Abbreviations: 8-RM = eight-repetition maximum; AE = aerobic exercise; G = Group; HE = home-based exercise; ME = multimodal exercise; PRT= progressive resistance training; RE = resistance exercise; RPE = rating of perceived exertion.

Supplementary Table 6.

## Exercise prescriptions for obesity.

| Types of exercise                     | Sample size, subjects characteristics                                                                               | Intervention                                     | Duration                  | Frequency                 | Intensity                                                                                                                                         | References |
|---------------------------------------|---------------------------------------------------------------------------------------------------------------------|--------------------------------------------------|---------------------------|---------------------------|---------------------------------------------------------------------------------------------------------------------------------------------------|------------|
| AE                                    | 42 subjects (lean, intermediate, obese),<br>G1 = 23.8 ± 1.0 years<br>G2 = 29.0 ± 2.0 years<br>G3 = 25.0 ± 1.2 years | G1: aerobic interval training                    | 8 weeks                   | 42 min; 3 days/week       | 60% HR <sub>max</sub> (10 min); 88%–92% HR <sub>max</sub> (4×4 min, intervals); 70% HR <sub>max</sub> ; 60% HR <sub>max</sub> (4×4 min intervals) | 9          |
|                                       |                                                                                                                     | G2: aerobic interval training                    |                           | 42 min; 3 days/week       |                                                                                                                                                   |            |
|                                       |                                                                                                                     | G3: aerobic interval training                    |                           | 42 min; 3 days/week       |                                                                                                                                                   |            |
|                                       | 22 subjects,<br>G1 = 25.10 ± 6.52 years<br>G2 = 31.14 ± 8.57 years                                                  | G1: training on a cycle ergometer or a treadmill | 6 weeks                   | 30–60 min; 3 days/week    | 60%–75% HRR                                                                                                                                       | 98         |
|                                       |                                                                                                                     | G2: training on a cycle ergometer or a treadmill |                           | 30–60 min; 3 days/week    |                                                                                                                                                   |            |
| 11 subjects,<br>G1 = 35.4 ± 1.5 years | G1: cycling and running                                                                                             | 8 weeks                                          | 45–60 min, 5 times a week | 35–85% VO <sub>2max</sub> | 99                                                                                                                                                |            |
| 15 subjects,<br>G1 = 38.3 ± 2.4 years | G1: training on a treadmill or a bike                                                                               | 10 weeks                                         | 1 h, 3 times a week       | ≥ 65% VO <sub>2max</sub>  | 100                                                                                                                                               |            |
| RE and HIIT                           | 8 subjects,<br>48.4 ± 3.9 years                                                                                     | G1: RE                                           | 36 days                   | 25 min                    | 70% 1-RM                                                                                                                                          | 101        |
|                                       |                                                                                                                     | G2: combined RE with HIIT                        |                           | 47 min                    | 70% 1-RM; 90% HR <sub>max</sub> (10 repetitions of 1 min cycling during HIIT)                                                                     |            |

Abbreviations: 1-RM= one-repetition maximum; AE = aerobic exercise; G = Group; HIIT = high intensity interval training; HRR = heart rate reserve; HR<sub>max</sub> = maximum heart rate; RE = resistance exercise; VO<sub>2max</sub> = maximum oxygen uptake.

Supplementary Table 7.

Exercise prescriptions for type 2 diabetes.

| Types of exercise | Sample size, subjects characteristics                                                                             | Intervention                                        | Duration | Frequency                     | Intensity                                                                                                                                                                    | References |
|-------------------|-------------------------------------------------------------------------------------------------------------------|-----------------------------------------------------|----------|-------------------------------|------------------------------------------------------------------------------------------------------------------------------------------------------------------------------|------------|
| CT                | 230 subjects,<br>G1 = 45.76 ± 9.91 years<br>G2 = 48.28 ± 8.17 years                                               | G1: training on a treadmill or a stationary bicycle | 3 months | 50 min; 3 days/week           | 10-min at 50–60% HR <sub>max</sub> and 40 min of the prescribed exercise program at 65–80% HR <sub>max</sub>                                                                 | 106        |
|                   |                                                                                                                   | G2: training on a treadmill or a stationary bicycle |          | 50 min; 3 days/week           |                                                                                                                                                                              |            |
| CT                | 243 subjects,<br>G1 = 54.6 ± 7.1 years<br>G2 = 54.0 ± 6.6 years<br>G3 = 54.8 ± 7.6 years<br>G4 = 53.6 ± 7.2 years | G1: control                                         | 6 months | —                             | —                                                                                                                                                                            | 107        |
|                   |                                                                                                                   | G2: AE                                              |          | 60–65 min; three times weekly | 15–20 min/session at 60% HR <sub>max</sub> to 45 min/session at 75% HR <sub>max</sub>                                                                                        |            |
|                   |                                                                                                                   | G3: RE                                              |          | 60–65 min; three times weekly | 2–3 sets of each exercise at the maximum weight that could be lifted 7–9 times                                                                                               |            |
|                   |                                                                                                                   | G4: CT                                              |          | 60–65 min; three times weekly | AE: 15–20 min/session at 60% HR <sub>max</sub> to 45 min/session at 75% HR <sub>max</sub> ; RE: 3 sets of each exercise at the maximum weight that could be lifted 7–9 times |            |
| RE                | 18 subjects,<br>G1 = 49.62 ± 8.05 years<br>G2 = 47.60 ± 7.70 years                                                | G1: control                                         | 8 weeks  | —                             | —                                                                                                                                                                            | 108        |



|      |                                                                |                                                                                                             |          |                                            |                                                                                                                               |     |
|------|----------------------------------------------------------------|-------------------------------------------------------------------------------------------------------------|----------|--------------------------------------------|-------------------------------------------------------------------------------------------------------------------------------|-----|
|      |                                                                | G2: RE                                                                                                      |          | 65–85 min; 3 non-consecutive days per week | 50%–70% 1-RM with 8–15 repetitions of within 45–60s (1–4weeks); 70–80% 1-RM with 8–10 repetitions of within 45–60s (5–8weeks) |     |
|      | 14 subjects,<br>G1: 61.3 ± 8.4 years                           | G1: consisted of 8 strength exercises for the lower and upper body                                          | 3 months | 2 nonconsecutive days per week             | 75% 1-RM                                                                                                                      | 109 |
| HIIT | 19 subjects,<br>G1 = 55.8 ± 9.0 years<br>G2 = 57.9 ± 5.4 years | G1: healthy age-matched controls completed an acute bout of HIIT<br>G2: T2D completed an acute bout of HIIT | once     | 7 × 1 min separated by 1 min recovery      | 85% peak power output<br>85% peak power output                                                                                | 110 |

Abbreviations: 1-RM = one-repetition maximum; AE = aerobic exercise; CT = combined aerobic exercise with resistance training; G = Group; HIIT = high intensity interval training; HR<sub>max</sub> = maximum heart rate; RE = resistance exercise.

Supplementary Table 8.

Exercise prescriptions for type 1 diabetes.

| Types of exercise  | Sample size, subjects characteristics                                                   | Intervention                                                                                                 | Duration | Frequency    | Intensity                                                                                       | References |
|--------------------|-----------------------------------------------------------------------------------------|--------------------------------------------------------------------------------------------------------------|----------|--------------|-------------------------------------------------------------------------------------------------|------------|
| HIIT               | 20 subjects,<br>G1 = 25.2 ± 5.5 years<br>G2 = 23.9 ± 4.4 years<br>G3 = 25.7 ± 5.8 years | G1: healthy controls: HIIT session was performed on a cycle ergometer                                        | once     | 15 min       | a Borg score of >15 (running from 6, indicating no exertion to 20, indicating maximal exertion) | 112        |
|                    |                                                                                         | G2: type 1 diabetes and normal awareness of hypoglycemia: HIIT session was performed on a cycle ergometer    |          | 15 min       | a Borg score of >15 (running from 6, indicating no exertion to 20, indicating maximal exertion) |            |
|                    |                                                                                         | G3: type 1 diabetes and impaired awareness of hypoglycemia : HIIT session was performed on a cycle ergometer |          | 15 min       | a Borg score of >15 (running from 6, indicating no exertion to 20, indicating maximal exertion) |            |
| endurance training | 16 subjects, without age data in the reference                                          | G1: healthy control: supervised cycle sprint training                                                        | 7 weeks  | 3 times/week | high-intensity                                                                                  | 113        |
|                    |                                                                                         | G2: patients with type 1 diabetes: supervised cycle sprint training                                          |          | 3 times/week | high-intensity                                                                                  |            |

Abbreviations: G = Group; HIIT = high intensity interval training.

Supplementary Table 9.

Exercise prescriptions for nonalcoholic fatty liver disease.

| Types of exercise                 | Sample size, subjects characteristics                                                     | Intervention                                                                  | Duration  | Frequency                       | Intensity                                                                                                    | References |
|-----------------------------------|-------------------------------------------------------------------------------------------|-------------------------------------------------------------------------------|-----------|---------------------------------|--------------------------------------------------------------------------------------------------------------|------------|
| AE                                | 80 subjects,<br>G1 = 51.0 ± 13.0 years<br>G2 = 41.0 ± 14.0 years<br>G3 = 46.0 ± 9.0 years | G1: control                                                                   | 4 weeks   | —                               | —                                                                                                            | 116        |
|                                   |                                                                                           | G2: HIIT                                                                      |           | —                               | 4 min intervals, 80% VO <sub>2peak</sub> ,<br>separated by 3 min active<br>recovery, 50% VO <sub>2peak</sub> |            |
|                                   |                                                                                           | G3: energy-matched moderate<br>intensity continuous exercise<br>training      |           | —                               | 55% VO <sub>2peak</sub>                                                                                      |            |
|                                   | 18 subjects,<br>G1 = 47.5 ± 3.1 years<br>G2 = 48.6 ± 2.2 years                            | G1: observation                                                               | 16 weeks  | —                               | —                                                                                                            | 117        |
|                                   |                                                                                           | G2: walking on a motor-driven<br>treadmill                                    |           | 30–60 min,<br>5 days/week       | 45%–55% VO <sub>2peak</sub>                                                                                  |            |
|                                   | 220 subjects,<br>G1 = 54.0 ± 6.8 years<br>G2 = 54.4 ± 7.4 years<br>G3 = 53.2 ± 7.1 years  | G1: health education sessions                                                 | 12 months | biweekly                        | —                                                                                                            | 118        |
| G2: moderate exercise             |                                                                                           | —                                                                             |           | moderate intensity              |                                                                                                              |            |
| G3: vigorous-moderate<br>exercise |                                                                                           | —                                                                             |           | vigorous-moderate intensity     |                                                                                                              |            |
| CT                                | 22 subjects,<br>G1 = 57.6 ± 8.1 years<br>G2 = 54.5 ± 6.8 years                            | G1: males matched individuals<br>without nonalcoholic: control                | 12 weeks  | —                               | —                                                                                                            | 119        |
|                                   |                                                                                           | G2: males with NAFLD:<br>combined aerobic and<br>resistance exercise training |           | 3 exercise sessions<br>per week | AE: 70% of maximal work<br>load; RE: 3 series of 10<br>repetitions 60% of the                                |            |

|  |  |  |  |  |                                  |  |
|--|--|--|--|--|----------------------------------|--|
|  |  |  |  |  | maximal voluntary<br>contraction |  |
|--|--|--|--|--|----------------------------------|--|

Abbreviations: AE = aerobic exercise; CT = combined aerobic exercise with resistance training; G = Group; HIIT = high intensity intermittent aerobic training; NAFLD = nonalcoholic fatty liver disease; RE = resistance exercise;  $VO_{2peak}$  = peak oxygen uptake.

Supplementary Table 10.

## Exercise prescriptions for coronary artery disease.

| Types of exercise                                               | Sample size, subjects characteristics                              | Intervention                              | Duration             | Frequency                                                                                                                                                                               | Intensity                                                       | References |
|-----------------------------------------------------------------|--------------------------------------------------------------------|-------------------------------------------|----------------------|-----------------------------------------------------------------------------------------------------------------------------------------------------------------------------------------|-----------------------------------------------------------------|------------|
| AE                                                              | 34 subjects,<br>G1 = 59.6 ± 11.8 years<br>G2 = 63.8 ± 8.0 years    | G1: control                               | 4 weeks              | —                                                                                                                                                                                       | —                                                               | 124        |
|                                                                 |                                                                    | G2: walking                               |                      | 30 min of walking per day, 5 days per week                                                                                                                                              | moderate-intensity equivalent to 60% $\text{VO}_{2\text{peak}}$ |            |
|                                                                 | 30 subjects,<br>G1 = 58.33 ± 1.88 years<br>G2 = 56.80 ± 1.82 years | G1: control                               | 10 weeks             | —                                                                                                                                                                                       | —                                                               | 125        |
|                                                                 |                                                                    | G2: intermittent exercise at 10 min bouts |                      | 30 min per day, 3 days a week                                                                                                                                                           | 60%–79% the $\text{HR}_{\text{max}}$                            |            |
|                                                                 | 72 subjects,<br>G1 = 58.0 ± 11.0 years<br>G2 = 58.0 ± 11.0 years   | G1: moderate continuous training          | 8 weeks              | 40 min/session                                                                                                                                                                          | 1 month: RPE scale: 11–13,<br>2 months: RPE scale: 14–16        | 15, 126    |
| G2: HIIT                                                        |                                                                    | 40 min/session                            |                      | 1 month: RPE scale: 11–13,<br>2 months: RPE scale: 14–16                                                                                                                                |                                                                 |            |
| 163 subjects,<br>G1 = 59.9 ± 9.2 years<br>G2 = 57.4 ± 8.7 years | G1: aerobic continuous training                                    | 12 weeks                                  | 47 min, 3 times/week | 5 min of warm-up at 60%–70% $\text{HR}_{\text{peak}}$ , 37 min of at least 70%–75% $\text{HR}_{\text{peak}}$ , 5 min cool-down at 60%–70% $\text{HR}_{\text{peak}}$                     | 127                                                             |            |
|                                                                 | G2: aerobic interval training                                      |                                           | 38 min, 3 times/week | 10 min of warm-up at 60%–70% $\text{HR}_{\text{peak}}$ ,<br>4 × 4-min intervals at 85%–95% $\text{HR}_{\text{peak}}$ ,<br>4 × 3 min of active rest at 50%–70% $\text{HR}_{\text{peak}}$ |                                                                 |            |
| 200 subjects,<br>G1 = 57.0 ± 8.8 years                          | G1: aerobic interval training                                      | 12 weeks                                  | 38 min, 3 times/week | 90%–95% $\text{HR}_{\text{peak}}$                                                                                                                                                       | 128                                                             |            |

|    |                                                                   |                                                                                                |          |                                                                                       |                                                                                                                                                                   |     |
|----|-------------------------------------------------------------------|------------------------------------------------------------------------------------------------|----------|---------------------------------------------------------------------------------------|-------------------------------------------------------------------------------------------------------------------------------------------------------------------|-----|
|    | G2 = 59.9 ± 9.2 years                                             | G2: aerobic continuous training                                                                |          | 47 min, 3 times/week                                                                  | 70%–75% HR <sub>peak</sub>                                                                                                                                        |     |
| HE | 196 subjects,<br>G1 = 70.3 ± 8.26 years<br>G2 = 70.2 ± 10.7 years | G1: hospital-based exercise training                                                           | 6 months | 30–50 min, 3 times per week                                                           | 60%–80% target HRR                                                                                                                                                | 129 |
|    |                                                                   | G2: home-based exercise training                                                               |          | 30–50 min, 3 times per week                                                           | 60%–80% target HRR                                                                                                                                                |     |
|    | 53 subjects,<br>G1 = 67.0 ± 8.0 years<br>G2 = 65.0 ± 10.0 years   | G1: usual care                                                                                 | 6 months | —                                                                                     | —                                                                                                                                                                 | 130 |
|    |                                                                   | G2: home-based AE training using a stationary cycle or treadmill; RE or calisthenics exercises |          | AE: 30 min, twice daily;<br>RE or calisthenics exercises: 20 min of on alternate days | AE: light to moderately hard perceived exertion; RE: at 70%–80% of maximal workload based on 1-RM (3 sets of 4 exercises with 10–12 repetitions of each exercise) |     |

Abbreviations: 1-RM= one-repetition maximum; AE = aerobic exercise; G = Group; HE = home-based exercise; HR<sub>peak</sub> = peak heart rate; HRR = heart rate reserve; RE = resistance exercise; RPE = rating of perceived exertion; VO<sub>2peak</sub> = peak oxygen uptake.

Supplementary Table 11.

Exercise prescriptions for stroke.

| Types of exercise                                                    | Sample size, subjects characteristics                          | Intervention                                 | Duration                  | Frequency                                                                             | Intensity                                     | References |
|----------------------------------------------------------------------|----------------------------------------------------------------|----------------------------------------------|---------------------------|---------------------------------------------------------------------------------------|-----------------------------------------------|------------|
| AE                                                                   | 57 subjects,<br>G1 = 65.7 ± 2.3 years<br>G2 = 64.7 ± 3.6 years | G1: conventional rehabilitation              | 12 weeks                  | —                                                                                     | —                                             | 132        |
|                                                                      |                                                                | G2: aerobic cycle aerometry                  |                           | 30 min, 3 days/week                                                                   | 50%–75% of WR achieved at: $\dot{V}O_{2peak}$ |            |
|                                                                      | 75 subjects,<br>20–90 years                                    | G1: cognitive training                       | 12 weeks                  | 60 min per day,<br>3 days per week                                                    | —                                             | 133        |
|                                                                      |                                                                | G2: AE                                       |                           | 60 min per day,<br>3 days per week                                                    | 40%–70% $HR_{max}$                            |            |
|                                                                      |                                                                | G3: combination of AE and cognitive training |                           | first receive 30 min of AE, followed by 30 min of cognitive training, 3 days per week | 40%–70% $HR_{max}$                            |            |
| 38 subjects,<br>G1 = 64.10 ± 12.40 years<br>G2 = 58.96 ± 14.68 years | G1: AE                                                         | 8 weeks                                      | 45 min,<br>3 times a week | 70% $HR_{max}$                                                                        | 134                                           |            |
|                                                                      | G2: stretching exercise                                        |                                              | 45 min,<br>3 times a week | —                                                                                     |                                               |            |
| 56 subjects,<br>G1 = 70.4 ± 8.1 years<br>G2 = 71.3 ± 7.0 years       | G1: no exercise                                                | 12 weeks                                     | —                         | —                                                                                     | 135                                           |            |
|                                                                      | G2: AE                                                         |                                              | 60 min,<br>2 times/week   | RPE scale: 14–15                                                                      |                                               |            |

|    |                                                                     |                                                                                                                                                                                                                 |          |                                                            |                                                                            |     |
|----|---------------------------------------------------------------------|-----------------------------------------------------------------------------------------------------------------------------------------------------------------------------------------------------------------|----------|------------------------------------------------------------|----------------------------------------------------------------------------|-----|
|    | 23 subjects,<br>G1 = 65.9 ± 6.4 years<br>G2 = 66.9 ± 7.8 years      | G1: AE<br>G2: balance and flexibility                                                                                                                                                                           | 6 months | 60 min,<br>3 times/week<br>60 min,<br>3 times/week         | 40% to 70%–80% HRR by<br>increasing 10% HRR every<br>4 weeks<br>< 40% HRR  | 137 |
| RE | 67 subjects,<br>G1 = 72.6 ± 5.5 years<br>G2 = 73.7 ± 5.3 years      | G1: regular activities<br>G2: progressive resistance<br>and balance exercises                                                                                                                                   | 3 months | —<br>75 min, 2 days/week                                   | —<br>low (>15 repetitions) to<br>moderate (10–15 repetitions)<br>intensity | 136 |
|    | 20 subjects,<br>G1 = 53.90 ± 5.82 years<br>G2 = 54.10 ± 11.69 years | G1: basic exercise<br>treatment followed by an<br>automated full-body<br>workout<br>G2: basic exercise<br>treatment followed by an<br>automated full-body<br>workout and respiratory<br>muscle training regimen | 4 weeks  | 50 min, 3 times per<br>week<br>70 min, 3 times per<br>week | —<br>—                                                                     | 138 |
| CT | 41 subjects,<br>G1 = 63.6 ± 13.5 years                              | G1: CT                                                                                                                                                                                                          | 6 weeks  | 90 min, once per<br>week                                   | 40%–70% HRR or VO <sub>2peak</sub> ;<br>RPE scale: 13–14                   | 139 |

Abbreviations: AE = aerobic exercise; CT = combined aerobic exercise with resistance training; G = Group; HR<sub>max</sub> = maximum heart rate; HRR = heart rate reserve; RE = resistance exercise; RPE = rating of perceived exertion; VO<sub>2peak</sub> = peak oxygen uptake.



Supplementary Table 12.

Exercise prescriptions for chronic heart failure.

| Types of exercise                                              | Sample size, subjects characteristics                                                                            | Intervention                                                              | Duration                                                    | Frequency                                                                              | Intensity                                                   | References |
|----------------------------------------------------------------|------------------------------------------------------------------------------------------------------------------|---------------------------------------------------------------------------|-------------------------------------------------------------|----------------------------------------------------------------------------------------|-------------------------------------------------------------|------------|
| AE                                                             | 90 subjects,<br>G1 = 51.91 ± 15.20 years<br>G2 = 51.64 ± 10.48 years                                             | G1: usual care<br>G2: received the walking and breathing intervention     | 12 weeks                                                    | —<br>twice daily in the morning and afternoon                                          | —<br>RPE: 12–13                                             | 141        |
|                                                                | 56 subjects, mean age:<br>G1 = 54.0 ± 2.0 years<br>G2 = 56.0 ± 2.0 years                                         | G1: untrained<br>G2: cycling on an ergometer bicycle                      | 4 months                                                    | —<br>60 min, 3 times/week                                                              | —<br>60%–72% VO <sub>2peak</sub>                            |            |
| RE                                                             | 72 subjects,<br>G1 = 53.0 ± 3.0 years<br>G2 = 54.0 ± 4.0 years<br>G3 = 71.0 ± 3.0 years<br>G4 = 71.0 ± 4.0 years | G1: middle-age: home-based exercise                                       | 4 weeks                                                     | —                                                                                      | —                                                           | 148        |
|                                                                |                                                                                                                  | G2: middle-age: closed-chain resistive activities and abdominal exercises |                                                             | 30–60 min, 6 times weekly                                                              | 60%–70%–85% progressively of the individual VO <sub>2</sub> |            |
|                                                                |                                                                                                                  | G3: elderly: home-based exercise                                          |                                                             | —                                                                                      | —                                                           |            |
|                                                                | G4: elderly: closed-chain resistive activities and abdominal exercises                                           | 30–60 min, 6 times weekly                                                 | 60%–70%–85% progressively of the individual VO <sub>2</sub> |                                                                                        |                                                             |            |
| 36 subjects,<br>G1 = 64.4 ± 2.4 years<br>G2 = 61.3 ± 2.8 years | G1: untrained control<br>G2: aerobic training                                                                    | 12 weeks                                                                  | —<br>46.5 min, 3 supervised sessions                        | —<br>1–6 weeks: 50%–60% VO <sub>2peak</sub><br>7–12 weeks: 60%–70% VO <sub>2peak</sub> | 149                                                         |            |

|                                                                  |                                                                  |                                          |                      |                                                                                            |                                                                                                                                                              |     |
|------------------------------------------------------------------|------------------------------------------------------------------|------------------------------------------|----------------------|--------------------------------------------------------------------------------------------|--------------------------------------------------------------------------------------------------------------------------------------------------------------|-----|
|                                                                  | G3 = 58.8 ± 3.5 years                                            |                                          |                      | per week                                                                                   |                                                                                                                                                              |     |
|                                                                  |                                                                  | G3: resistance training                  |                      | 46.5 min, 3 supervised sessions per week                                                   | 1–6 weeks: 50%–60% 1-RM<br>7–12 weeks: 60%–70% 1-RM                                                                                                          |     |
| HIIT                                                             | 100 subjects,<br>G1 = 63.0 ± 9.0 years<br>G2 = 56.0 ± 11.0 years | G1: as usual                             | 12 weeks             | —                                                                                          | —                                                                                                                                                            | 143 |
|                                                                  |                                                                  | G2: HIIT                                 |                      | 45min/day, 3 days/week                                                                     | 80% WR <sub>peak</sub> and progressively to 100% WR <sub>peak</sub>                                                                                          |     |
|                                                                  | 26 subjects,<br>G1 = 55.0 ± 12.0 years<br>G2 = 54.0 ± 9.0 years  | G1: continuous training                  | 8 weeks              | 168 min of exercise weekly                                                                 | heart rate at the first ventilatory threshold and a final 5 minutes of active recovery                                                                       | 144 |
|                                                                  |                                                                  | G2: interval training                    |                      | 360 min of exercise weekly                                                                 | 50% and 80% of the maximal power                                                                                                                             |     |
|                                                                  | 17 subjects,<br>G1 = 59.7 ± 10.8 years<br>G2 = 59.8 ± 7.4 years  | G1: continuous aerobic exercise training | 24 weeks             | 3 times a week                                                                             | 40%–60% VO <sub>2peak</sub>                                                                                                                                  | 145 |
|                                                                  |                                                                  | G2: HIIT                                 |                      | 3 times a week                                                                             | very low intensity active cycling phases of 1 min at 20%–30% of peak power output followed by high intensity cycling for 30 s at 50% of the maximum workload |     |
| 100 subjects,<br>G1 = 63.0 ± 9.0 years<br>G2 = 56.0 ± 11.0 years | G1: no exercise                                                  | 12 weeks                                 | —                    | —                                                                                          | 146                                                                                                                                                          |     |
|                                                                  | G2: HIIT                                                         |                                          | 45 min, 3 days/week  | 1–2 weeks: 30% 1-RM, 3 sets of 8–10 repetitions; 3–5 weeks: 50% 1-RM; 6–12 weeks: 90% 1-RM |                                                                                                                                                              |     |
| 28 subjects,<br>G1 = 52.0 ± 11.0 years                           | G1: interval cycle exercise                                      | 3 months                                 | 40 min, 3 times/week | 50% of the peak workload                                                                   | 147                                                                                                                                                          |     |

|  |                        |                                                      |                         |                                           |  |
|--|------------------------|------------------------------------------------------|-------------------------|-------------------------------------------|--|
|  | G2 = 54.0 ± 10.0 years | G2: interval cycle exercise<br>and strength training | 40 min, 3<br>times/week | 50% of the peak workload; 55%–65%<br>2-RM |  |
|--|------------------------|------------------------------------------------------|-------------------------|-------------------------------------------|--|

Abbreviations: 1-RM = one repetition maximum; 2-RM= two-repetition maximum; AE = aerobic exercise; G = Group; HIIT = high intensity interval training; HRR = heart rate reserve; RE = resistance exercise; VO<sub>2</sub> = oxygen uptake; VO<sub>2peak</sub> = peak oxygen uptake; WR<sub>peak</sub> = peak work rate.

Supplementary Table 13.

## Exercise prescriptions for Parkinson's disease.

| Types of exercise                                                   | Sample size, subjects characteristics                                    | Intervention                    | Duration                   | Frequency                 | Intensity                                                                                                                                                                           | References |
|---------------------------------------------------------------------|--------------------------------------------------------------------------|---------------------------------|----------------------------|---------------------------|-------------------------------------------------------------------------------------------------------------------------------------------------------------------------------------|------------|
| AE                                                                  | 62 subjects,<br>G1 = 66–75 years<br>G2 = 64–71 years<br>G3 = 66–68 years | G1: functional training         | 8 weeks                    | 50 min, 3 times/week      | progressively with barbells and manual resistance                                                                                                                                   | 152        |
|                                                                     |                                                                          | G2: Kinect Adventures exergames |                            | 50 min, 3 times/week      | progressively with different game levels of difficulty                                                                                                                              |            |
|                                                                     |                                                                          | G3: stationary bicycle          |                            | 50 min, 3 times/week      | 1 week: 50% HR <sub>max</sub> ;<br>2–3 weeks: 55% HR <sub>max</sub> ;<br>4–5 weeks: 65% HR <sub>max</sub> ;<br>6–7 weeks: 70% HR <sub>max</sub> ;<br>8 weeks: 75% HR <sub>max</sub> |            |
|                                                                     | 43 subjects,<br>G1 = 64.7 ± 5.2 years<br>G2 = 67.6 ± 7.5 years           | G1: interval walking            | 6 months                   | 45 min, 3 times/week      | every 3 min between slower (60%–70% HR <sub>max</sub> ) and faster (80%–90% HR <sub>max</sub> ) walking                                                                             | 153        |
| G2: continuous walking                                              | 45 min, 3 times/week                                                     | 70%–80% HR <sub>max</sub>       |                            |                           |                                                                                                                                                                                     |            |
| 49 subjects,<br>G1 = 68.78 ± 3.72 years<br>G2 = 68.78 ± 11.33 years | G1: community group: walking program                                     | 12 weeks                        | 40–55 min,<br>3 times/week | RPE scale: 10–12          | 154                                                                                                                                                                                 |            |
|                                                                     | G2: walking program                                                      |                                 | 40–55 min,<br>3 times/week | RPE scale: 10–12          |                                                                                                                                                                                     |            |
| 2 subjects,<br>G1 = 61 years<br>G2 = 72 years                       | G1: woman with PD dementia:<br>stationary bicycle                        | 8 weeks                         | 1 h, 3 times/week          | 50%–75% HR <sub>max</sub> | 155                                                                                                                                                                                 |            |

|    |                                                                                         |                                                                            |           |                                                                                                                         |                                                                                                                                                                                       |     |
|----|-----------------------------------------------------------------------------------------|----------------------------------------------------------------------------|-----------|-------------------------------------------------------------------------------------------------------------------------|---------------------------------------------------------------------------------------------------------------------------------------------------------------------------------------|-----|
|    |                                                                                         | G2: man with mild cognitive impairments: stationary bicycle                |           | 1 h, 3 times/week                                                                                                       | 50%–75% HR <sub>max</sub>                                                                                                                                                             |     |
|    | 23 subjects,<br>G1 = 71.2 ± 9.2 years                                                   | G1: treadmill training                                                     | 12 weeks  | 60 min, sessions a week                                                                                                 | RPE scale: 10–15                                                                                                                                                                      | 156 |
| RE | 26 subjects,<br>G1 = 62.2 ± 2.0 years<br>G2 = 62.7 ± 1.3 years                          | G1: patients without PD: bilateral and unilateral knee extension exercises | once      | 30–50 min                                                                                                               | 2 sets of 5 repetitions for each exercise: the first set with a comfortable workload, a 2-min rest interval, and the second set with the estimated workload corresponding to 10–12 RM | 157 |
|    |                                                                                         | G2: patients with PD: bilateral and unilateral knee extension exercises    |           | 30–50 min                                                                                                               | 2 sets of 5 repetitions for each exercise: the first set with a comfortable workload, a 2-min rest interval, and the second set with the estimated workload corresponding to 10–12 RM |     |
|    | 60 subjects,<br>G1 = 61.2 ± 7.7 years<br>G2 = 59.0 ± 4.6 years<br>G3 = 58.6 ± 5.6 years | G1: control                                                                | 24 months | —                                                                                                                       | —                                                                                                                                                                                     | 158 |
|    |                                                                                         | G2: progressive RE                                                         |           | 60–90 min, (2 ×/week for 6 months, 1 ×/week for remaining 18 months), and number of exercises sessions (2 ×/week for 24 | —                                                                                                                                                                                     |     |

|                  |                                                                                                |                                                                                              |          |                                                                                                                                           |                                                                         |     |
|------------------|------------------------------------------------------------------------------------------------|----------------------------------------------------------------------------------------------|----------|-------------------------------------------------------------------------------------------------------------------------------------------|-------------------------------------------------------------------------|-----|
|                  |                                                                                                | G3: modified fitness counts: non-progressive strength, balance, and stretching exercises     |          | months)<br>60–90 min, 2 ×/week for 6 months, 1 ×/week for remaining 18 months), and number of exercises sessions (2 ×/week for 24 months) |                                                                         |     |
|                  | 27 subjects,<br>G1 = 61.89 ± 6.79 years<br>G2 = 61.44 ± 11.91 years<br>G3 = 63.44 ± 8.79 years | G1: control<br>G2: treadmill with 5% of load<br>G3: treadmill with 10% of load               | 4 weeks  | 30 min, 3 times/week<br>30 min, 3 times/week<br>30 min, 3 times/week                                                                      | 75% HR <sub>max</sub><br>75% HR <sub>max</sub><br>75% HR <sub>max</sub> | 159 |
| ME               | 40 subjects,<br>G1 = 66.00 ± 1.80 years<br>G2 = 64.35 ± 10.53 years                            | G1: Tai Chi<br>G2: ME                                                                        | 12 weeks | 1 h, twice weekly<br>1 h, twice weekly                                                                                                    | —<br>gradually increasing resistance                                    | 160 |
|                  | 23 subjects,<br>G1 = 74.9 ± 5.1 years<br>G2 = 74.5 ± 9.4 years<br>G3 = 68.4 ± 6.3 years        | G1: individualized exercises<br>G2: group exercises<br>G3: basic activities unchanged        | 6 months | 1 h, 2 attendances per week<br>1 h, 2 attendances per week<br>—                                                                           | 3 series of 10 repetitions<br>3 series of 10 repetitions<br>—           | 161 |
|                  | 48 subjects,<br>G1 = 64.6 ± 6.8 years<br>G2 = 64.2 ± 6.7 years<br>G3 = 63.9 ± 8.5 years        | G1: home exercise program<br>G2: individual physical therapy<br>G3: group class intervention | 4 weeks  | 60 min, 3 times/week<br>60 min, 3 times/week<br>60 min, 3 times/week                                                                      | —<br>—<br>—                                                             | 162 |
| aquatic exercise | 18 subjects,                                                                                   | G1: usual care                                                                               | 6 weeks  | —                                                                                                                                         | —                                                                       | 163 |

|  |                        |                             |  |                     |   |  |
|--|------------------------|-----------------------------|--|---------------------|---|--|
|  | G1 = 67–77 years       | G2: aquatic exercise (water |  | 45min, twice a week | — |  |
|  | G2 = 67.75–71.75 years | temperature: 32 °C)         |  |                     |   |  |

Abbreviations: AE = aerobic exercise; G = Group; HR<sub>max</sub> = maximum heart rate; ME = multimodal exercise; PD = Parkinson's disease; RE = resistance exercise; RM = repetition maximum; RPE = rating of perceived exertion.

Supplementary Table 14.

## Exercise prescriptions for Huntington's disease.

| Types of exercise | Sample size, subjects characteristics                          | Intervention                                         | Duration | Frequency              | Intensity                                                                                                                                                                                                                             | References |
|-------------------|----------------------------------------------------------------|------------------------------------------------------|----------|------------------------|---------------------------------------------------------------------------------------------------------------------------------------------------------------------------------------------------------------------------------------|------------|
| HIIT              | 24 subjects,<br>G1 = 49.1 ± 6.8 years<br>G2 = 54.8 ± 7.1 years | G1: health control, endurance training               | 6 months | 30 min, 3 times a week | 1–10 weeks, 65% VO <sub>2peak</sub> ; after the first regeneration week, HIIT (4×4 min cycling at a power eliciting 90%–95 % HR <sub>peak</sub> ) during regeneration weeks, at 50% VO <sub>2peak</sub>                               | 166        |
|                   |                                                                | G2: patients with HD, endurance training             |          | 30 min, 3 times a week | 1 – 10 weeks, 65% VO <sub>2peak</sub> ; after the first regeneration week, high-intensity interval trainings (4×4 min cycling at a power eliciting 90%–95% HR <sub>peak</sub> ) during regeneration weeks, at 50% VO <sub>2peak</sub> |            |
|                   | 24 subjects,<br>G1 = 49.7 ± 6.8 years<br>G2 = 53.2 ± 8.8 years | G1: healthy controls, constant load cycling and HIIT | 26 weeks | 30 min, 3 times a week | 1–10 weeks: 65% VO <sub>2peak</sub><br>11–18 weeks: HIIT (4×4 min at 90%–95% HR <sub>peak</sub> with 3 min low-intensity rest intervals at 70% HR <sub>peak</sub> )                                                                   | 167        |
|                   |                                                                | G2: HD patients, constant load cycling and HIIT      |          | 30 min, 3 times a week | 1–10 weeks: 65% VO <sub>2peak</sub><br>11–18 weeks: HIIT (4×4 min at 90%–95% of HR <sub>peak</sub> with 3                                                                                                                             |            |



|                                                                  |                                                                  |                                                                                |              |                                                                            |                                                                                                                                                                               |     |
|------------------------------------------------------------------|------------------------------------------------------------------|--------------------------------------------------------------------------------|--------------|----------------------------------------------------------------------------|-------------------------------------------------------------------------------------------------------------------------------------------------------------------------------|-----|
|                                                                  |                                                                  |                                                                                |              |                                                                            | min low-intensity rest intervals at 70% HR <sub>peak</sub> )                                                                                                                  |     |
| CT                                                               | 21 subjects,<br>G1 = 47.4 ± 9.5 years<br>G2 = 53.3 ± 12.5 years  | G1: no exercise                                                                | 12 weeks     | —                                                                          | —                                                                                                                                                                             | 168 |
|                                                                  |                                                                  | G2: stationary cycling and resistance exercises and home-based walking program |              | CT: 20–30 min, 3 times/week<br>home-based walking: 10–30 min, twice weekly | AE: 55%–75% HR <sub>max</sub> ; RE: 2 full sets of 8–12 repetitions could be performed at 60%–70% of 1-RM, with a 2-min rest between sets; home-based walking: RPE scale: 3–4 |     |
| ME                                                               | 62 subjects,<br>< 50 years or ≥ 50 years                         | G1: social interaction                                                         | 16 weeks     | 6 home visits and interim telephone calls over a course of 14 weeks        | —                                                                                                                                                                             | 165 |
|                                                                  |                                                                  | G2: physical activity intervention                                             |              | 45 min, daily                                                              | —                                                                                                                                                                             |     |
|                                                                  | 33 subjects,<br>G1 = 51.0 ± 17.0 years<br>G2 = 53.0 ± 11.0 years | G1: as usual                                                                   | 12 weeks     | —                                                                          | —                                                                                                                                                                             | 169 |
|                                                                  |                                                                  | G2: AE, strengthening and stretching                                           |              | 50 min, 3 times/week                                                       | 65%–85% age-predicted HR <sub>max</sub>                                                                                                                                       |     |
| 30 subjects,<br>G1 = 59.4 ± 10.0 years<br>G2 = 55.0 ± 10.0 years | G1: usual care                                                   | 8 weeks                                                                        | —            | —                                                                          | 170                                                                                                                                                                           |     |
|                                                                  | G2: task-specific mobility training                              |                                                                                | twice a week | —                                                                          |                                                                                                                                                                               |     |

Abbreviations: 1-RM = one-repetition maximum; AE = aerobic exercise; CT = combined aerobic exercise with resistance training; G = Group; HD = Huntington’s disease;

HIIT = high intensity interval training;  $HR_{\text{peak}}$  = peak heart rate; ME = multimodal exercise; RPE = rating of perceived exertion;  $\dot{V}O_{2\text{peak}}$  = peak oxygen uptake.

Supplementary Table 15.

Exercise prescriptions for Alzheimer's disease.

| Types of exercise  | Sample size, subjects characteristics                                                    | Intervention                                                                | Duration  | Frequency                                                                           | Intensity                                               | References |
|--------------------|------------------------------------------------------------------------------------------|-----------------------------------------------------------------------------|-----------|-------------------------------------------------------------------------------------|---------------------------------------------------------|------------|
| AE                 | 65 subjects,<br>G1 = 71.1 ± 8.8 years<br>G2 = 74.1 ± 6.8 years                           | G1: stretching and toning                                                   | 26 weeks  | weekly                                                                              | HR below 100 beats per minute                           | 173        |
|                    |                                                                                          | G2: AE                                                                      |           | 1 week: 60 min and increased their weekly by 21 min per week until 150 min per week | 40%–55% HRR, then 60%–75% HRR                           |            |
|                    | 19 subjects,<br>G1 = 78.6 ± 11.3 years                                                   | G1: group balance training                                                  | 12 weeks  | 40 – 45 min, twice per week                                                         | —                                                       | 174        |
| ME                 | 16 subjects,<br>G1 = 76.0 ± 4.0 years<br>G2 = 73.0 ± 4.0 years                           | G1: routine nursing/medical care                                            | 12 weeks  | —                                                                                   | —                                                       | 175        |
|                    |                                                                                          | G2: joint mobility, resistance, coordination exercises, stretching, walking |           | 75 min, 3 times/week                                                                | medium-resistance bands (3 sets of 15 repetitions each) |            |
| HE                 | 214 subjects,<br>without age data in the reference                                       | G1: usual care                                                              | 24 weeks  | —                                                                                   | —                                                       | 176        |
|                    |                                                                                          | G2: home-based balance exercise                                             |           | 5 times a week                                                                      | —                                                       |            |
|                    | 210 subjects,<br>G1 = 78.1 ± 5.3 years<br>G2 = 71.1 ± 8.8 years<br>G3 = 78.3 ± 5.1 years | G1: as usual                                                                | 12 months | —                                                                                   | —                                                       | 177        |
| G2: HE             |                                                                                          | 1 h, twice a week                                                           |           | —                                                                                   |                                                         |            |
| G3: group exercise | 1 h, twice a week                                                                        | —                                                                           |           |                                                                                     |                                                         |            |

|                                                                                          |                                  |        |                   |   |     |
|------------------------------------------------------------------------------------------|----------------------------------|--------|-------------------|---|-----|
| 210 subjects,<br>G1 = 78.1 ± 5.3 years<br>G2 = 78.3 ± 5.1 years<br>G3 = 77.7 ± 5.4 years | G1: usual community care         | 1 year | —                 | — | 178 |
|                                                                                          | G2: group-based exercise         |        | 1 h, twice a week | — |     |
|                                                                                          | G3: tailored home-based exercise |        | 1 h, twice a week | — |     |

Abbreviations: AE = aerobic exercise; G = Group; HE = home-based exercise; HR<sub>peak</sub> = peak heart rate; HRR = heart rate reserve; ME = multimodal exercise.

Supplementary Table 16.

Exercise prescriptions for depression.

| Types of exercise | Sample size, subjects characteristics                                                 | Intervention                                                                | Duration | Frequency                        | Intensity                               | References |
|-------------------|---------------------------------------------------------------------------------------|-----------------------------------------------------------------------------|----------|----------------------------------|-----------------------------------------|------------|
| AE                | 119 subjects,<br>G1 = 45.3 ±10.6 years<br>G2 = 48.5 ±9.4 years                        | G1: AE                                                                      | 12 weeks | a high dose of<br>16kcal/kg/week | —                                       | 182        |
|                   |                                                                                       | G2: AE                                                                      |          | a low dose of<br>4kcal/kg/week   | —                                       |            |
|                   | 121 subjects,<br>G1 = 75.6 ±5.6 years<br>G2 = 74.9 ±6.2 years<br>G3 = 74.9 ±6.2 years | G1: antidepressants<br>(sertraline)                                         | 24 weeks | —                                | —                                       | 183,184    |
|                   |                                                                                       | G2: antidepressants plus<br>low-intensity, non-progressive<br>exercise      |          | 3 times per week                 | not to exceed<br>70% HR <sub>peak</sub> |            |
|                   |                                                                                       | G3: antidepressants plus<br>high-intensity, progressive<br>aerobic exercise |          | 3 times per week                 | not to exceed<br>70% HR <sub>peak</sub> |            |
|                   | 50 subjects,<br>G1 = 41.76 ±10.4<br>years<br>G2 = 38.84 ±11.5<br>years                | G1: as usual                                                                | 2 weeks  | —                                | —                                       | 185        |
| G2: AE            |                                                                                       | 16.5 kcal/kg/week, 3<br>sessions per week                                   |          | —                                |                                         |            |

Abbreviations: AE = aerobic exercise; G = Group; HR<sub>peak</sub> = peak heart rate.

Supplementary Table 17.

## Exercise prescriptions for anxiety disorders.

| Types of exercise | Sample size, subjects characteristics                                                         | Intervention            | Duration | Frequency                           | Intensity                                                | References |
|-------------------|-----------------------------------------------------------------------------------------------|-------------------------|----------|-------------------------------------|----------------------------------------------------------|------------|
| AE                | 41 subjects,<br>G1 = 30.95 ± 11.68 years<br>G2 = 35.33 ± 13.3 years                           | G1: stretching routine  | once     | 30 min                              | below 50% age-adjusted maximum HRR                       | 189        |
|                   |                                                                                               | G2: AE                  |          | 30 min                              | 60%–80% age-adjusted maximum HRR                         |            |
| HE                | 86 subjects,<br>G1 = 40.45 ± 11.25 years<br>G2 = 39.76 ± 11.09 years                          | G1: traditional care    | 3 months | —                                   | —                                                        | 190        |
|                   |                                                                                               | G2: home-based exercise |          | 30 min per day,<br>5 days per week  | moderate to vigorous                                     |            |
| AE or RE          | 77 subjects,<br>G1 = 19.74 ± 1.72 years<br>G2 = 20.12 ± 2.64 years<br>G3 = 19.19 ± 2.00 years | G1: no exercise         | once     | —                                   | —                                                        | 191        |
|                   |                                                                                               | G2: AE                  |          | 20 min                              | 65%–75% age-adjusted predicted HR <sub>max</sub>         |            |
|                   |                                                                                               | G3: RE                  |          | 20 min                              | 2 sets of each exercise to exhaustion                    |            |
|                   | 30 subjects,<br>G1 = 24.2 ± 6.3 years<br>G2 = 20.7 ± 3.0 years<br>G3 = 25.6 ± 7.1 years       | G1: no exercise         | 6 weeks  | —                                   | —                                                        | 192        |
|                   |                                                                                               | G2: AE                  |          | 2 weekly sessions of 16 min         | weekly 5% progression in load                            |            |
|                   |                                                                                               | G3: RE                  |          | 46 min and 40 s and required 16 min | 1 week: 50% of 1-RM and progressing by 5% of 1-RM weekly |            |

Abbreviations: 1-RM = one-repetition maximum; AE = aerobic exercise; G = Group; HE = home-based exercise; HRR = heart rate reserve; HR<sub>max</sub> = maximum heart rate; RE = resistance exercise.

Supplementary Table 18.

## Exercise prescriptions for chronic obstructive pulmonary disease.

| Types of exercise    | Sample size, subjects characteristics                                                    | Intervention                                                   | Duration | Frequency                             | Intensity                                                     | References |
|----------------------|------------------------------------------------------------------------------------------|----------------------------------------------------------------|----------|---------------------------------------|---------------------------------------------------------------|------------|
| RE                   | 49 subjects,<br>G1 = 65.59 ± 8.65 years<br>G2 = 65.85 ± 8.21 years                       | G1: control                                                    | 6 months | —                                     | —                                                             | 197        |
|                      |                                                                                          | G2: individualized physical strength outpatient training       |          | 90 min, 2 days/week                   | 35%–75% of the maximal muscle strength                        |            |
|                      | 29 subjects,<br>G1 = 63.5 ± 5.9 years                                                    | G1: endurance and strength training                            | 12 weeks | 38 min, 3 days/week                   | 70%–80% WR <sub>peak</sub> ; 1 set each with 8–15 repetitions | 198        |
| water-based exercise | 53 subjects,<br>G1 = 70.0 ± 9.0 years<br>G2 = 72.0 ± 10.0 years<br>G3 = 73.0 ± 7.0 years | G1: no exercise training                                       | 8 weeks  | —                                     | —                                                             | 199        |
|                      |                                                                                          | G2: land-based exercise training                               |          | 60 min sessions, three times per week | intensity of dyspnoea and perceived exertion ratings of 3–5   |            |
|                      |                                                                                          | G3: water-based exercise                                       |          | 60 min sessions, three times per week | intensity of dyspnoea and perceived exertion ratings of 3–5   |            |
| ME                   | 58 subjects,<br>G1 = 72.12 ± 8.19 years<br>G2 = 75.65 ± 6.25 years                       | G1: standard medical and pharmacological care                  | 12 days  | —                                     | —                                                             | 200        |
|                      |                                                                                          | G2: training with a pedal exerciser                            |          | once per day                          | level 6 of dyspnea or fatigue in the Borg scale               |            |
| AE                   | 40 subjects,<br>G1 = 61.3 ± 2.89 years<br>G2 = 59.7 ± 2.76 years                         | G1: only routine care                                          | 6 months | —                                     | —                                                             | 201        |
| G2: Tai Chi          | 50min, 7 sessions per week with one session per day                                      | adjusted for each COPD patient according to her/his toleration |          |                                       |                                                               |            |

|                                                                 |                                   |          |                             |                       |     |
|-----------------------------------------------------------------|-----------------------------------|----------|-----------------------------|-----------------------|-----|
| 143 subjects,<br>G1 = 68.0 ± 9.0 years<br>G2 = 69.0 ± 8.0 years | G1: usual medical care            | 10 weeks | —                           | —                     | 202 |
|                                                                 | G2: ground-based walking training |          | 45 min,<br>3 times per week | dyspnoea score of 3–4 |     |

Abbreviations: AE = aerobic exercise; COPD = chronic obstructive pulmonary disease; G = Group; RE = resistance exercise; RPE = rating of perceived exertion;  $WR_{\text{peak}}$  = peak work rate.



Supplementary Table 19.

Exercise prescription for interstitial lung disease.

| Types of exercise | Sample size, subjects characteristics                            | Intervention                                        | Duration | Frequency            | Intensity                         | References |
|-------------------|------------------------------------------------------------------|-----------------------------------------------------|----------|----------------------|-----------------------------------|------------|
| CT                | 142 subjects,<br>G1 = 73.0 ± 9.0 years<br>G2 = 70.0 ± 10.0 years | G1: usual care                                      | 8 weeks  | —                    | —                                 | 204        |
|                   |                                                                  | G2: supervised outpatient exercise training program |          | 30 min, twice weekly | 70% WR <sub>max</sub> ; 10–12 RM  |            |
| CT                | 116 subjects,<br>without age data in the reference               | G1: usual care                                      | 8 weeks  | —                    | —                                 | 205        |
|                   |                                                                  | G2: supervised exercise training                    |          | 30 min, twice weekly | 70% WR <sub>max</sub> ; RPE:12–14 |            |

Abbreviations: CT = combined aerobic exercise with resistance training; G = Group; RM = repetition maximum; RPE = rating of perceived exertion, WR<sub>max</sub> = maximum work rate.

Supplementary Table 20.

Exercise prescriptions for after lung transplantation.

| Types of exercise | Sample size, subjects characteristics                          | Intervention                                                 | Duration | Frequency              | Intensity                                         | References |
|-------------------|----------------------------------------------------------------|--------------------------------------------------------------|----------|------------------------|---------------------------------------------------|------------|
| WBV exercise      | 70 subjects,<br>G1 = 55.0 ± 7.0 years<br>G2 = 55.0 ± 9.0 years | G1: the same amount of exercise time on the floor            | 4 weeks  | 5–6 days per week      | 60% WR <sub>peak</sub> ; 3 sets of 20 repetitions | 207        |
|                   |                                                                | G2: whole body vibration exercise                            |          | 5–6 days per week      | 60% WR <sub>peak</sub> ; 3 sets of 20 repetitions |            |
| CT                | 40 subjects,<br>G1 = 59.0 ± 6.0 years<br>G2 = 59.0 ± 4.0 years | G1: daily physical activity                                  | 3 months | —                      | —                                                 | 208        |
|                   |                                                                | G2: cycling, walking, stair climbing and resistance exercise |          | 90 min, 3 times weekly | Borg score of 4–6                                 |            |

Abbreviations: CT = combined aerobic exercise with resistance training; G = Group; WBV = whole body vibration; WR<sub>peak</sub> = peak work rate.

Supplementary Table 21.

Exercise prescriptions for chronic kidney disease.

| Types of exercise | Sample size, subjects characteristics                          | Intervention                                                                   | Duration                                                        | Frequency                                   | Intensity                                               | References |
|-------------------|----------------------------------------------------------------|--------------------------------------------------------------------------------|-----------------------------------------------------------------|---------------------------------------------|---------------------------------------------------------|------------|
| AE                | 46 subjects,<br>G1 = 57.1 ± 9.0 years<br>G2 = 58.0 ± 8.0 years | G1: sedentary<br>G2: AE                                                        | 16 weeks                                                        | —<br>40 min, 3 times/week                   | —<br>50%–60% VO <sub>2peak</sub>                        | 212        |
| RE                | 38 subjects,<br>G1 = 63–72 years<br>G2 = 57–65 years           | G1: usual physical activity<br>G2: progressive RE                              | 8 weeks                                                         | —<br>3 times a week                         | —<br>70% of predicted 1-RM, 3 sets of 10–12 repetitions | 213        |
| CT                | 47 subjects,<br>G1 = 68.8 ± 11.8 years                         | G1: CT by self-training                                                        | 6 months                                                        | 6 sessions per month at 1.5–2 h per session | RPE scale:12–14                                         | 214        |
| HE                | 36 subjects,<br>G1 = 67.8 ± 6.9 years<br>G2 = 69.0 ± 6.8 years | G1: normal daily activities<br>G2: home-based aerobic and resistance exercises | 12 months                                                       | —<br>AE: 30 min/day<br>RE: 3 times/week     | —<br>moderate-intensity                                 | 215        |
|                   | 72 subjects,<br>G1 = 62.0 ± 8.4 years<br>G2 = 60.2 ± 9.7 years | G1: usual care<br>G2: home-based CT with diet                                  | 8 weeks (supervised training) + 10 months (home-based training) | —<br>150 min/week                           | —<br>moderate-intensity                                 | 216        |

|                                                                                          |                                       |                                              |                            |                            |     |
|------------------------------------------------------------------------------------------|---------------------------------------|----------------------------------------------|----------------------------|----------------------------|-----|
| 32 subjects,<br>G1 = 62.0 ± 8.4 years<br>G2 = 60.2 ± 9.7 years                           | G1: diet-alone                        | 12 weeks(CT) + 40<br>weeks(home-based<br>CT) | —                          | —                          | 217 |
|                                                                                          | G2: CT+<br>home-based CT<br>with diet |                                              | 3 days per week            | moderate-intensity         |     |
| 40 subjects,<br>G1 = 54.7 ± 14.1 years<br>G2 = 51.5 ± 11.8 years                         | G1: usual care                        | 3 months                                     | —                          | —                          | 218 |
|                                                                                          | G2: home-based<br>AE                  |                                              | at least 40 min/day        | moderate-intensity         |     |
| 29 subjects,<br>G1 = 54.3 ± 8.7 years<br>G2 = 55.9 ± 7.7 years                           | G1: usual care                        | 12 weeks                                     | —                          | —                          | 219 |
|                                                                                          | G2: home-based<br>AE                  |                                              | 40 min, 3 times per week   | 40%–60% VO <sub>2max</sub> |     |
| 27 subjects,<br>G1 = 53.4 ± 9.6 years<br>G2 = 52.1 ± 11.4 years<br>G3 = 50.8 ± 7.7 years | G1: control                           | 12 weeks                                     | —                          | —                          | 220 |
|                                                                                          | G2: centre-based<br>exercise          |                                              | 30–50 min,<br>3 times/week | 40%–60% VO <sub>2max</sub> |     |
|                                                                                          | G3: home-based<br>exercise            |                                              | 3 times/week               | 40%–60% VO <sub>2max</sub> |     |

Abbreviations: 1-RM = one-repetition maximum; AE = aerobic exercise; CT = combined aerobic exercise with resistance training; G = Group; HE = home-based exercise; RE = resistance exercise; RPE = rating of perceived exertion; VO<sub>2peak</sub> = peak oxygen uptake; VO<sub>2max</sub> = maximum oxygen uptake.

Supplementary Table 22.

Exercise prescriptions for kidney transplantation.

| Types of exercise | Sample size, subjects characteristics                                                      | Intervention                            | Duration  | Frequency                | Intensity                                    | References |
|-------------------|--------------------------------------------------------------------------------------------|-----------------------------------------|-----------|--------------------------|----------------------------------------------|------------|
| AE and RE         | 60 subjects,<br>G1 = 49.5 ± 10.6 years<br>G2 = 53.9 ± 10.7 years<br>G3 = 54.6 ± 10.6 years | G1: standard care                       | 12 weeks  | —                        | —                                            | 223        |
|                   |                                                                                            | G2: AE                                  |           | 60 min, 3 times per week | RPE scale: 13–15                             |            |
|                   |                                                                                            | G3: RE                                  |           | 60 min, 3 times per week | high-intensity resistance training at 80% RM |            |
| CT                | 120 subjects,<br>18–65 years                                                               | G1: standard clinical care              | 12 months | —                        | —                                            | 224        |
|                   |                                                                                            | G2: progressive exercise rehabilitation |           | 60 min, 2 times /week    | low-intensity                                |            |

Abbreviations: AE = aerobic exercise; CT = combined aerobic exercise with resistance training; G = Group; RE = resistance exercise; RM = repetition maximum.

Supplementary Table 23.

## Exercise prescriptions for breast cancer.

| Types of exercise                                               | Sample size, subjects characteristics                                                       | Intervention                     | Duration     | Frequency                                                                     | Intensity                                                                            | References |
|-----------------------------------------------------------------|---------------------------------------------------------------------------------------------|----------------------------------|--------------|-------------------------------------------------------------------------------|--------------------------------------------------------------------------------------|------------|
| AE                                                              | 135 subjects,<br>G1 = 34.6 ± 7.47 years<br>G2 = 35.2 ± 6.38 years<br>G3 = 33.4 ± 6.76 years | G1: maintained exercise          | 11 weeks     | <75 min/week                                                                  | 1–4 weeks: 65%–70 % HR <sub>max</sub> ;<br>5–11 weeks: 70%–80 % of HR <sub>max</sub> | 230        |
|                                                                 |                                                                                             | G2: low-dose exercise            |              | 150 min/week                                                                  | 1–4 weeks: 65%–70 % HR <sub>max</sub> ;<br>5–11 weeks: 70%–80 % HR <sub>max</sub>    |            |
|                                                                 |                                                                                             | G3: high-dose exercise           |              | 300 min/week                                                                  | 1–4 weeks: 65%–70 % HR <sub>max</sub> ;<br>5–11 weeks: 70%–80 % HR <sub>max</sub>    |            |
|                                                                 | 400 subjects,<br>50–74 years                                                                | G1: moderate volume of AE        | 1 year       | 30 min, days per week                                                         | 65%–75% HRR                                                                          | 231        |
|                                                                 |                                                                                             | G2: high volume of AE            |              | 60 min, 5 days per week                                                       | 65%–75% HRR                                                                          |            |
|                                                                 | 139 subjects,<br>G1 = 34.6 ± 7.5 years<br>G2 = 35.2 ± 6.4 years<br>G3 = 33.4 ± 6.8 years    | G1: pre-study levels of exercise | 5 months     | —                                                                             | —                                                                                    | 232        |
| G2: low dose AE                                                 |                                                                                             | 150 min/week                     |              | 1 month: 65%–70% HR <sub>max</sub> ,<br>2–5 months: 70%–80% HR <sub>max</sub> |                                                                                      |            |
| G3: high dose AE                                                |                                                                                             | 300 min/week                     |              | 1 month: 65%–70% HR <sub>max</sub> ,<br>2–5 months: 70%–80% HR <sub>max</sub> |                                                                                      |            |
| 101 subjects,<br>G1 = 50.7 ± 9.4 years<br>G2 = 49.3 ± 9.6 years | G1: wait-list control                                                                       | 16 weeks                         | —            | —                                                                             | 234                                                                                  |            |
|                                                                 | G2: moderate-intensity AE                                                                   |                                  | 150 min/week | moderate-intensity                                                            |                                                                                      |            |
| RE                                                              | 146 subjects,                                                                               | G1: progressive muscle           | 12 weeks     | —                                                                             | —                                                                                    | 229        |

|    |                                                                    |                                       |          |                           |                                                                                      |     |
|----|--------------------------------------------------------------------|---------------------------------------|----------|---------------------------|--------------------------------------------------------------------------------------|-----|
|    | G1 = 55.9 ± 8.7 years<br>G2 = 54.5 ± 9.6 years                     | relaxation                            |          |                           |                                                                                      |     |
|    |                                                                    | G2: different machine-based RE        |          | —                         | 3 sets with an intensity of a 12-RM                                                  |     |
|    | 101 subjects,<br>G1 = 53.3 ± 10.3 years<br>G2 = 52.2 ± 9.9 years   | G1: relaxation control                | 12 weeks | 60 min,<br>twice/week     | —                                                                                    | 235 |
|    |                                                                    | G2: progressive RE                    |          | 60 min,<br>twice/week     | 3 sets, 8–12 repetitions at 60%–80% 1-RM                                             |     |
|    | 160 subjects,<br>G1 = 56.4 ± 8.7 years<br>G2 = 52.2 ± 9.5 years    | G1: relaxation control                | 12 weeks | 60 min,<br>twice/week     | —                                                                                    | 236 |
|    |                                                                    | G2: progressive RE                    |          | 60 min,<br>twice/week     | 3 sets, 8–12 repetitions at 60%–80% 1-RM                                             |     |
|    | 103 subjects,<br>G1 = 57.3 ± 8.8 years<br>G2 = 57.1 ± 8.9 years    | G1: relaxation control                | 12 weeks | 60 min,<br>twice/week     | —                                                                                    | 237 |
|    |                                                                    | G2: progressive RE                    |          | 60 min,<br>twice/week     | 3 sets, 8–12 repetitions at 60%–80% 1-RM                                             |     |
| CT | 69 subjects,<br>G1 = 52.48 ± 5.57 years<br>G2 = 54.78 ± 3.42 years | G1: conventional decongestive therapy | 4 weeks  | —                         | —                                                                                    | 233 |
|    |                                                                    | G2: complex exercise                  |          | 1 h daily, 5 times a week | moderate-to-severe                                                                   |     |
|    | 204 subjects,<br>25–75 years                                       | G1: usual care                        | 18 weeks | —                         | —                                                                                    | 238 |
|    |                                                                    | G2: CT                                |          | 60 min/week               | AE: a heart rate at (3 × 2 min–2 × 7 min) or below (3 × 4 min–1 × 7 min) ventilatory |     |

|                                                                                          |                           |                             |                              |                              |                                                                                                   |          |                                                                            |
|------------------------------------------------------------------------------------------|---------------------------|-----------------------------|------------------------------|------------------------------|---------------------------------------------------------------------------------------------------|----------|----------------------------------------------------------------------------|
|                                                                                          |                           |                             |                              |                              | threshold; RE:<br>65%–75%–45% 1-RM<br>progressively                                               |          |                                                                            |
| 296 subjects, age:<br>< 50 years or ≥ 50<br>years                                        | G1: a standard dose of AE | 12 weeks<br>and 18<br>weeks | 25–30min, 3<br>days per week | 50–60min, 3<br>days per week | vigorous                                                                                          | 239      |                                                                            |
|                                                                                          | G2: a higher dose of AE   |                             |                              |                              | vigorous                                                                                          |          |                                                                            |
|                                                                                          | G3: a higher dose of CT   |                             |                              |                              | vigorous; 2 sets of 10–12<br>repetitions of 9 different<br>strength exercises at<br>60%–75 % 1-RM |          |                                                                            |
| 301 subjects,<br>G1 = 49.5 ± 8.0 years<br>G2 = 49.9 ± 8.7 years<br>G3 = 50.5 ± 9.4 years | G1: standard dose of AE   | 12 weeks                    | 25–30 min, 3<br>times/week   | 50–60min, 3<br>days per week | vigorous                                                                                          | 240, 241 |                                                                            |
|                                                                                          | G2: a higher dose of AE   |                             |                              |                              | vigorous                                                                                          |          |                                                                            |
|                                                                                          | G3: a higher dose of CT   |                             |                              |                              | vigorous; 2 sets of 10–12<br>repetitions of 9 different<br>strength exercises at<br>60%–75 % 1-RM |          |                                                                            |
| 200 subjects,<br>25–78 years                                                             | G1: usual care            | 17 weeks                    | —                            | —                            | —                                                                                                 | 242      |                                                                            |
|                                                                                          | G2: AE                    |                             |                              |                              | 60 min,<br>3 times/week                                                                           |          | 15 min at 60% VO <sub>2peak</sub> and 45<br>min at 80% VO <sub>2peak</sub> |
|                                                                                          | G3: RE                    |                             |                              |                              | 60 min,<br>3 times/week                                                                           |          | 2 sets of 8–12 repetitions of 9<br>exercises, 60%–70% 1-RM                 |

Abbreviations: 1-RM = one-repetition maximum 12-RM = twelve-repetition maximum; AE = aerobic exercise; CT = combined aerobic exercise with resistance training; G =



Group;  $HR_{\max}$  = maximum heart rate; HRR = heart rate reserve; RE = resistance exercise;  $VO_{2\text{peak}}$  = peak oxygen uptake.

Supplementary Table 24.

## Exercise prescriptions for colon cancer.

| Types of exercise | Sample size, subjects characteristics                                                    | Intervention                                              | Duration | Frequency                 | Intensity                                                                                                                  | References |
|-------------------|------------------------------------------------------------------------------------------|-----------------------------------------------------------|----------|---------------------------|----------------------------------------------------------------------------------------------------------------------------|------------|
| AE                | 46 subjects,<br>G1 = 62.3 ± 7.9 years<br>G2 = 57.5 ± 8.0 years                           | G1: usual care                                            | 8 weeks  | —                         | —                                                                                                                          | 246        |
|                   |                                                                                          | G2: core stabilization exercises and stretching exercises |          | 90 min, 3 times/week      | —                                                                                                                          |            |
|                   | 39 subjects,<br>47–61 years                                                              | G1: pre-study levels of physical activity                 | 6 months | —                         | —                                                                                                                          | 245, 247   |
|                   |                                                                                          | G2: low dose AE                                           |          | 150 min/week              | moderate-intensity                                                                                                         |            |
|                   |                                                                                          | G3: high dose AE                                          |          | 300 min/week              | moderate-intensity                                                                                                         |            |
|                   | 39 subjects,<br>G1 = 57.9 ± 9.7 years<br>G2 = 58.2 ± 9.8 years<br>G3 = 53.1 ± 10.5 years | G1: pre-study levels of physical activity                 | 6 months | —                         | —                                                                                                                          | 248, 249   |
| G2: low dose AE   |                                                                                          | 150 min/week                                              |          | 50%–70% HR <sub>max</sub> |                                                                                                                            |            |
| G3: high dose AE  |                                                                                          | 300 min/week                                              |          | 50%–70% HR <sub>max</sub> |                                                                                                                            |            |
| CT                | 33 subjects,<br>G1 = 58.1 ± 10.3 years<br>G2 = 58.1 ± 9.6 years                          | G1: usual physical activity                               | 18 weeks | —                         | —                                                                                                                          | 250        |
|                   |                                                                                          | G2: CT                                                    |          | 60 min, twice a week      | AE: a heart rate at (3 × 2 min–2 × 7 min) or below (3 × 4 min–1 × 7 min) ventilatory threshold;<br>RE: 65%–75%–45%<br>1-RM |            |

|                                                                          |                                                           |   |                                                |                        |     |
|--------------------------------------------------------------------------|-----------------------------------------------------------|---|------------------------------------------------|------------------------|-----|
| 31 subjects,<br>G1 = 57.43 ± 6.12<br>years<br>G2 = 55.61 ± 7.11<br>years | G1: unsupervised<br>sitting or walking                    | — | daily                                          | —                      | 251 |
|                                                                          | G2: stretching, core,<br>balance, and<br>low-intensity RE |   | 15min/session, 3<br>sessions/day,<br>twice/day | 12 repetition × 3 sets |     |

Abbreviations: 1-RM = one-repetition maximum; AE = aerobic exercise; CT = combined aerobic exercise with resistance training; G = Group; HR<sub>max</sub> = maximum heart rate; RE = resistance exercise.

Supplementary Table 25.

## Exercise prescriptions for prostate cancer.

| Types of exercise | Sample size, subjects characteristics                                    | Intervention                                  | Duration | Frequency                                                             | Intensity                  | References |
|-------------------|--------------------------------------------------------------------------|-----------------------------------------------|----------|-----------------------------------------------------------------------|----------------------------|------------|
| AE                | 31 subjects, age:<br>< 30 years or 30–60 years                           | G1: usual care                                | 12 weeks | —                                                                     | —                          | 254        |
|                   |                                                                          | G2: community-based exercise training program |          | 2 supervised sessions and 1 unsupervised, home-based session per week | —                          |            |
|                   | 41 subjects,<br>G1 = 54.5–81.6 years<br>G2 = 61.7–81.7 years             | G1: usual care                                | 11 weeks | —                                                                     | —                          | 255        |
|                   |                                                                          | G2: walking                                   |          | 1h/week, 10,000 steps/day                                             | —                          |            |
| RE                | 51 subjects,<br>G1 = 70.5 ± 7.8 years<br>G2 = 69.9 ± 9.3 years           | G1: stretching control                        | 1 year   | 2 × 1 h, supervised classes and 1 × 30–45 min home-based session/week | —                          | 256, 257   |
|                   |                                                                          | G2: resistance and impact training            |          | 2 × 1 h, supervised classes and 1 × 30–45 min home-based session/week | RE: 60%–80% 1-RM           |            |
| CT                | 63 subjects,<br>G1 = 67.1 ± 7.5 years<br>G2 = 69.6 ± 6.5 years           | G1: usual care                                | 3 months | —                                                                     | —                          | 258        |
|                   |                                                                          | G2:CT                                         |          | twice weekly                                                          | moderate-high intensity    |            |
|                   | 97 subjects, mean age:<br>G1 = 69.1 ± 8.4 years<br>G2 = 69.1 ± 9.4 years | G1: usual care                                | 6 months | —                                                                     | —                          | 259        |
|                   |                                                                          | G2: CT                                        |          | twice weekly                                                          | 70%–90% VO <sub>2max</sub> |            |

|                                                                                         |                                            |           |                       |                                                    |     |
|-----------------------------------------------------------------------------------------|--------------------------------------------|-----------|-----------------------|----------------------------------------------------|-----|
| 100 subjects,<br>G1 = 71.5 ± 7.2 years<br>G2 = 71.9 ± 5.6 years                         | G1: physical activity                      | 6 months  | —                     | —                                                  | 260 |
|                                                                                         | G2: CT                                     |           | 150 min/week          | 12–6 RM for 2–4 sets;<br>70%–85% HR <sub>max</sub> |     |
| 57 subjects,<br>G1 = 70.1 ± 7.3 years<br>G2 = 69.5 ± 7.3 years                          | G1: usual care                             | 12 weeks  | —                     | —                                                  | 261 |
|                                                                                         | G2: CT                                     |           | 150 min, 2 times/week | moderate-high intensity                            |     |
| 57 subjects,<br>G1 = 70.1 ± 7.3 years<br>G2 = 69.7 ± 7.3 years                          | G1: usual care                             | 12 weeks  | —                     | —                                                  | 262 |
|                                                                                         | G2: CT                                     |           | 2 times/week          | 65%–80% HR <sub>max</sub> ; Borg<br>scale: 11–13   |     |
| 195 subjects,<br>without age data in the<br>reference                                   | G1: usual care                             | 12 months | —                     | —                                                  | 263 |
|                                                                                         | G2: resistance/impact<br>loading exercise  |           | 60min, 2 times/week   | 6–12 RM using 1–4<br>sets/exercise                 |     |
|                                                                                         | G3: resistance/<br>cardiovascular exercise |           | 60min, 2 times/week   | 60%–85% HR <sub>max</sub>                          |     |
| 87 subjects,<br>G1 = 66.9 ± 6.6 years<br>G2 = 65.0 ± 6.3 years<br>G3 = 65.3 ± 6.3 years | G1: usual routines                         | 8 weeks   | —                     | —                                                  | 264 |
|                                                                                         | G2: low-intensity CT                       |           | 60min, 3 days/week    | 60%–65% VO <sub>2peak</sub> ;<br>50%–65% 1-RM      |     |
|                                                                                         | G3: high-intensity CT                      |           | 60min, 3 days/week    | 75%–80% VO <sub>2peak</sub> ;<br>65%–80% 1-RM      |     |

Abbreviations: 1-RM = one-repetition maximum; AE = aerobic exercise; CT = combined aerobic exercise with resistance training; G = Group; HR<sub>max</sub> = maximum heart rate; RE = resistance exercise; RM = repetition maximum; VO<sub>2max</sub> = maximum oxygen uptake; VO<sub>2peak</sub> = peak oxygen uptake.

Supplementary-Table 26.

## Exercise prescriptions for lung cancer.

| Types of exercise | Sample size, subjects characteristics                                 | Intervention                                      | Duration | Frequency                    | Intensity                                    | References |
|-------------------|-----------------------------------------------------------------------|---------------------------------------------------|----------|------------------------------|----------------------------------------------|------------|
| HE                | 116 subjects,<br>G1 = 63.57 ± 10.54 years<br>G2 = 64.76 ± 11.28 years | G1: usual care                                    | 12 weeks | —                            | —                                            | 267        |
|                   |                                                                       | G2: home-based, walking-exercise                  |          | 40min, 3 days/week           | moderate-intensity                           |            |
|                   | 92 subjects,<br>≥ 18 years                                            | G1: usual care                                    | 8 weeks  | —                            | —                                            | 272        |
|                   |                                                                       | G2: endurance and resistance home-based exercises |          | at least 150 min/week        | Borg dyspnea scale: 4–6                      |            |
| AE                | 27 subjects,<br>G1 = 60.46 ± 7.08 years<br>G2 = 62.64 ± 8.35 years    | G1: usual care                                    | 16 weeks | —                            | —                                            | 268        |
|                   |                                                                       | G2: Tai Chi                                       |          | 60 min, 3 times/week         | —                                            |            |
|                   | 91 subjects,<br>G1 = 60.46 ± 7.08 years<br>G2 = 62.64 ± 8.35 years    | G1: low-impact exercise                           | 12 weeks | 1 h session, every other day | —                                            | 269        |
|                   |                                                                       | G2: Tai Chi                                       |          | 1 h session, every other day | —                                            |            |
| CT                | 78 subjects,<br>G1 = 65.0 ± 9.0 years<br>G2 = 64.0 ± 10.0 years       | G1: strength training                             | 10 weeks | 30 min, twice a week         | RPE scale: 11–12                             | 270        |
|                   |                                                                       | G2: group-based supervised exercise               |          | 1 h, once a week             | 60% – 80% of work capacity; RPE scale: 11–12 |            |
| AE and RE         | 123 subjects,<br>without age data in the reference                    | G1: without specific physical training            | 12 weeks | 20 min weekly                | —                                            | 271        |
|                   |                                                                       | G2: AE and                                        |          | 45 min + 20                  | 50%–70% VO <sub>2peak</sub>                  |            |

|      |                                                                   |                                                    |          |                               |                                                                                                         |          |
|------|-------------------------------------------------------------------|----------------------------------------------------|----------|-------------------------------|---------------------------------------------------------------------------------------------------------|----------|
|      |                                                                   | respiratory training                               |          | min, twice weekly             |                                                                                                         |          |
|      |                                                                   | G3: RE and respiratory training                    |          | 75 min + 20 min, twice weekly | 2–6 weeks: 40%–50% 1-RM; 6–12 weeks: 60%–80% 1-RM, 3 sets of 8–12 repetitions                           |          |
| HIIT | 61 subjects,<br>G1 = 65.9 ± 8.5 years<br>G2 = 64.4 ± 9.3 years    | G1: standard postoperative care                    | 20 weeks | —                             | —                                                                                                       | 273      |
|      |                                                                   | G2: high-intensity endurance and strength training |          | 60 min, three times a week    | 80%–95% of HR <sub>max</sub> and in 3 series of 6–12 RM                                                 |          |
|      | 151 subjects,<br>G1 = 64.0 ± 10.0 years<br>G2 = 64.0 ± 13.0 years | G1: walking                                        | 4 weeks  | 30 min, 4 times per week      | —                                                                                                       | 274, 275 |
|      |                                                                   | G2: HIIT                                           |          | 2–3 times a week              | warm up: 50% HR <sub>peak</sub> ; HIIT: 80%–100% HR <sub>peak</sub> ; cool down: 30% HR <sub>peak</sub> |          |

Abbreviations: 1-RM = one-repetition maximum; AE = aerobic exercise; CT = combined aerobic exercise with resistance training; G = Group; HE = home-based exercise; HIIT = high intensity interval training; HR<sub>peak</sub> = peak heart rate; HR<sub>max</sub> = maximum heart rate; RE = resistance exercise; RPE = rating of perceived exertion; RM = repetition maximum; VO<sub>2peak</sub> = peak oxygen uptake.
